# Supplementary material for: Development and Validation of an m6A RNA Methylation Regulator-Based Signature for Prognostic Prediction in Cervical Squamous Cell Carcinoma
Source: Front Oncol. 2020 Aug 21;10:1444. doi: 10.3389/fonc.2020.01444 (PMC7472601; doi:10.3389/fonc.2020.01444)
Supplement: Supplementary file 2 [file Data_Sheet_1.xlsx]

## Sheet: Supplementary File-clinical dat
A0_Samples	A18_Sex	A19_Height	A1_OS	A20_Weight	A21_BMI	A22_histological_type	A23_Tumor_tissue_site	A2_Event	A3_T	A4_N	A5_M	A6_Stage	A7_Grade	A8_New_Event	A8_New_Event_Time	A8_New_Event_Tissue	A8_New_Event_Type	A9_Cancer_Status	additional_studies	age_at_initial_pathologic_diagnosis	age_began_smoking_in_years	assessment_timepoint_category	bcr_patient_barcode	bcr_patient_uuid	birth_control_pill_history_usage_category	cervical_carcinoma_corpus_uteri_involvement_indicator	cervical_carcinoma_pelvic_extension_text	cervical_neoplasm_pathologic_margin_involved_text	cervical_neoplasm_pathologic_margin_involved_type	day_of_form_completion	days_to_birth	days_to_death	days_to_diagnostic_computed_tomography_performed	days_to_diagnostic_mri_performed	days_to_fdg_or_ct_pet_performed	days_to_initial_pathologic_diagnosis	days_to_laboratory_procedure_tumor_marker_squamous_cell_carcinoma_antigen_result	days_to_last_followup	days_to_performance_status_assessment	death_cause_text	diagnostic_ct_result_outcomes	diagnostic_ct_result_outcomes.diagnostic_ct_result_outcome	diagnostic_mri_result_outcomes	diagnostic_mri_result_outcomes.diagnostic_mri_result_outcome	drugs.drug.bcr_drug_barcode	drugs.drug.bcr_drug_uuid	drugs.drug.clinical_trail_drug_classification	drugs.drug.day_of_form_completion	drugs.drug.days_to_drug_therapy_end
TCGA-VS-A9UT	FEMALE	144	482	42	20.2546	Mucinous Adenocarcinoma of Endocervical Type	Cervical	Alive	T1b1	N1	MX	Stage IB	G3	0	482			TUMOR FREE		72	Not Available	Not Applicable	TCGA-VS-A9UT	A945FD96-FFB3-4787-BACD-60DA4560C8A5	Never Used	Not Available	Not Available	Uninvolved margins	Other Location, specify	1	-26603	Not Applicable	Not Available	Not Available	Not Available	0	Not Available	104	-1	Not Available
TCGA-JW-A5VK	FEMALE	158	623	68	27.2392	Cervical Squamous Cell Carcinoma	Cervical	Alive	T1b2	NX	MX	Stage IB2	G3	0	623			TUMOR FREE		43	33	Not Applicable	TCGA-JW-A5VK	BBB96B5A-80E8-4542-80B4-2444CF1FE51E	Never Used	Not Available	Not Available	Not Applicable	Not Available	31	-15965	Not Applicable	16	Not Available	Not Available	0	Not Available	198	9	Not Available		Bladder Absent;Extra-Pelvic Metastatic Disease Absent;Parametrium Absent;Paraaortic Nodes Absent;Pelvic Nodes Present;Supraclavicular Absent
TCGA-ZJ-AB0I	FEMALE	173	0	78	26.0617	Cervical Squamous Cell Carcinoma	Cervical	Alive	T2b	N1	MX	Stage IIB	Not Available	0	0			Unknown		25	13	Not Applicable	TCGA-ZJ-AB0I	A4F13656-A941-498A-9AC9-F020ED559B35	Never Used	Unknown	Not Available	Not Applicable	Unknown	19	-9486	Not Applicable	Not Available	Not Available	Not Available	0	Not Available	0	Not Available	Not Available
TCGA-VS-A9UU	FEMALE	162	442	67	25.5296	Cervical Squamous Cell Carcinoma	Cervical	Alive	T2b	NX	MX	Stage IIB	G1	0	442			TUMOR FREE		42	23	Not Applicable	TCGA-VS-A9UU	4770EC81-9174-4D2A-AF54-70C00696FB0B	Current User	Not Available	Not Available	Not Applicable	Not Available	1	-15534	Not Applicable	Not Available	Not Available	Not Available	0	Not Available	442	26	Not Available					TCGA-VS-A9UU-D65893	96F43D49-0111-4847-BC76-553F3DD390C3	Not Available	1	57
TCGA-PN-A8MA	FEMALE	167	90	71	25.4581	Cervical Squamous Cell Carcinoma	Cervical	Alive	T2b	N0	M0	Stage IIB	G3	1				WITH TUMOR		43	Not Available	during adjuvant therapy	TCGA-PN-A8MA	55ADD854-E63F-4335-BEA9-23C3EB1E766A	Former User	Unknown	Not Available	Not Applicable	Not Available	25	-15918	Not Applicable	Not Available	Not Available	Not Available	0	Not Available	90	90	Not Available					TCGA-PN-A8MA-D57802	0BA1607D-3682-49B1-A7AB-F5CF48525262	Not Available	13	48
TCGA-C5-A7CK	FEMALE	165	4086	55	20.202	Cervical Squamous Cell Carcinoma	Cervical	Dead				Stage IVA	G2	0	4086			TUMOR FREE		58	Not Available	Not Applicable	TCGA-C5-A7CK	1C48393E-7DE9-42F6-A6F0-2CBFB8359316	Not Available	Not Available	Not Available	Not Applicable	Not Available	3	-21520	4086	Not Available	Not Available	Not Available	0	Not Available	Not Available	Not Available	Not Available					TCGA-C5-A7CK-D56517	BFECC70B-9153-4C18-94FB-E3CC92E38501	Not Available	11	50
TCGA-C5-A2LZ	FEMALE	163	3046	85	31.9922	Cervical Squamous Cell Carcinoma	Cervical	Dead				Stage IIIB	G2	1	2893		Distant Metastasis	WITH TUMOR		65	15	Not Applicable	TCGA-C5-A2LZ	BE8FA67D-C2D3-4FFF-82FE-A46BA1FA8DF0	Unknown	Not Available	Not Available	Not Applicable	Not Available	10	-24059	3046	Not Available	Not Available	Not Available	0	Not Available	Not Available	Not Available	Not Available
TCGA-VS-A8Q9	FEMALE	150	1630	49	21.7778	Cervical Squamous Cell Carcinoma	Cervical	Alive	TX	NX	MX	Stage IB1	G2	0	1630			TUMOR FREE		79	Not Available	Not Applicable	TCGA-VS-A8Q9	5798D741-C198-4C14-BCC2-E3B17CAF1BE3	Unknown	Not Available	Not Available	Not Applicable	Not Available	30	-28881	Not Applicable	Not Available	Not Available	Not Available	0	Not Available	1400	90	Not Available
TCGA-VS-A9V5	FEMALE	157	494	98	39.7582	Mucinous Adenocarcinoma of Endocervical Type	Cervical	Dead	T2b	NX	MX	Stage IIB	G2	0	494			WITH TUMOR		50	Not Available	Not Applicable	TCGA-VS-A9V5	D3FF2AEB-46BE-4F54-8A8F-178EB921FBB6	Never Used	Not Available	Not Available	Not Applicable	Not Available	1	-18577	494	Not Available	Not Available	Not Available	0	Not Available	Not Available	0	Not Available					TCGA-VS-A9V5-D65882	502961DD-9C7F-4032-BED4-F6E20D29702F	Not Available	1	124
TCGA-EA-A6QX	FEMALE	154	730	49	20.6612	Cervical Squamous Cell Carcinoma	Cervical	Alive	T1b1	N1	M0	Stage IIIB	G3	0	730			TUMOR FREE		49	Not Available	Not Applicable	TCGA-EA-A6QX	A300DB40-E0B8-4C45-ABBD-D7AA06211E9C	Unknown	ABSENT	Not Available	Not Applicable	Unknown	16	-18035	Not Applicable	Not Available	Not Available	Not Available	0	Not Available	19	Not Available	Not Available
TCGA-VS-A8Q8	FEMALE	166	978	92	33.3866	Cervical Squamous Cell Carcinoma	Cervical	Dead	T1b	N0	MX	Stage IB	G2	1	488		Locoregional Recurrence	WITH TUMOR		26	Not Available	Not Applicable	TCGA-VS-A8Q8	6C3C8219-74AB-4E54-81F5-84D4D5884252	Former User	Not Available	Not Available	Not Applicable	Not Available	31	-9571	978	Not Available	Not Available	Not Available	0	Not Available	Not Available	-84	Not Available
TCGA-IR-A3LF	FEMALE	155	2949	86	35.796	Endocervical Adenocarcinoma of the Usual Type	Cervical	Alive	T1b1	N0	M0	Stage IB1	G2	0	2949			TUMOR FREE		64	Not Available	Not Applicable	TCGA-IR-A3LF	785DDEA1-399D-47D8-B2B0-39E95EAA24B5	Never Used	ABSENT	Not Available	Not Applicable	Not Available	24	-23721	Not Applicable	Not Available	Not Available	Not Available	0	Not Available	2949	Not Available	Not Available
TCGA-VS-A9UH	FEMALE	Not Available	1427	Not Available		Cervical Squamous Cell Carcinoma	Cervical	Alive	T4	NX	MX	Stage IVA	GX	0	1427			TUMOR FREE		53	Not Available	Not Applicable	TCGA-VS-A9UH	6949C03E-067A-49A5-B48D-E9380A1B0B27	Never Used	Not Available	Not Available	Not Applicable	Not Available	20	-19454	Not Applicable	Not Available	Not Available	Not Available	0	Not Available	1120	139	Not Available					TCGA-VS-A9UH-D63870	5ECDA20A-D998-4660-A6B2-F178C7B054EE	Not Available	20	133
TCGA-JW-A5VG	FEMALE	158	834	110	44.0635	Cervical Squamous Cell Carcinoma	Cervical	Alive	T2a	NX	MX	Stage IIA	G3	0	834			TUMOR FREE		35	Not Available	Not Applicable	TCGA-JW-A5VG	0BD52D75-5113-4EF1-BC75-509F59EAEF2B	Never Used	Not Available	Not Available	Not Applicable	Not Available	3	-13109	Not Applicable	-8	Not Available	Not Available	0	Not Available	439	439	Not Available		Pelvic Nodes Present			TCGA-JW-A5VG-D58206	907266E1-5423-4E3C-9C72-00B915F1BE87	Not Available	2	53
TCGA-EK-A2RN	FEMALE	176	71	68	21.9525	Cervical Squamous Cell Carcinoma	Cervical	Alive	T2b	N1	MX	Stage IB1	G2	1				WITH TUMOR		45	Not Available	Not Applicable	TCGA-EK-A2RN	B610D391-0C9D-4114-94D6-5E4AA4270122	Not Available	Not Available	Not Available	parametrial involvement on the right side only	Other Location, specify	5	-16487	Not Applicable	Not Available	Not Available	Not Available	0	Not Available	71	0	Not Available
TCGA-EK-A2RC	FEMALE	170	129	72	24.9135	Cervical Squamous Cell Carcinoma	Cervical	Alive				Stage IB1	G3	0	129			TUMOR FREE		33	Not Available	Not Applicable	TCGA-EK-A2RC	AC0AE100-8072-47CC-81D9-8B52B1BF9236	Not Available	Not Available	Not Available	Not Applicable	Positive vaginal margin	7	-12353	Not Applicable	Not Available	Not Available	Not Available	0	Not Available	129	120	Not Available
TCGA-VS-A953	FEMALE	155	477	47	19.563	Cervical Squamous Cell Carcinoma	Cervical	Dead	T4	NX	MX	Stage IVA	GX	0	477			WITH TUMOR		63	Not Available	Not Applicable	TCGA-VS-A953	DA901E97-3A1D-4952-8254-9C4E60D2812C	Never Used	Not Available	Not Available	Not Applicable	Not Available	17	-23277	477	Not Available	Not Available	Not Available	0	Not Available	Not Available	0	Not Available
TCGA-JW-A69B	FEMALE	155	863	69	28.7201	Endocervical Type of Adenocarcinoma	Cervical	Alive	T1b2	NX	MX	Stage IB2	GX	0	863			TUMOR FREE		44	Not Available	Not Applicable	TCGA-JW-A69B	FB4AF6B2-4BED-4DBE-9309-29F59ED30FB2	Never Used	Not Available	Not Available	Not Applicable	Not Available	10	-16080	Not Applicable	34	Not Available	Not Available	0	Not Available	306	34	Not Available		Bladder Absent;Extra-Pelvic Metastatic Disease Absent;Parametrium Absent;Paraaortic Nodes Absent;Pelvic Nodes Absent;Supraclavicular Absent
TCGA-IR-A3LH	FEMALE	154	2394	74	31.2026	Cervical Squamous Cell Carcinoma	Cervical	Alive	T2a1	N0	M0	Stage IIA1	G4	0	2394			TUMOR FREE		49	24	Not Applicable	TCGA-IR-A3LH	F24ED9C0-92BB-4003-86D2-42AB26617A05	Former User	ABSENT	Not Available	Not Applicable	Positive vaginal margin	13	-18118	Not Applicable	Not Available	Not Available	Not Available	0	Not Available	2394	Not Available	Not Available					TCGA-IR-A3LH-D38301	3D3105F8-BC2E-4485-B58F-96DDF1DB8EE8	Not Available	14	183
TCGA-C5-A3HL	FEMALE	Not Available	621	Not Available		Cervical Squamous Cell Carcinoma	Cervical	Alive	T1b2	N0	MX	Stage IB2	G2	0	621			TUMOR FREE		76	Not Available	Not Applicable	TCGA-C5-A3HL	09329A53-D58D-4480-95D8-32043E40DE6E	Never Used	ABSENT	Not Available	margins free of tumor	Other Location, specify	17	-27963	Not Applicable	Not Available	Not Available	Not Available	0	Not Available	621	Not Available	Not Available
TCGA-EK-A2RB	FEMALE	175	9	105	34.2857	Cervical Squamous Cell Carcinoma	Cervical	Alive				Stage IVB	G3	0	9			TUMOR FREE		48	Not Available	post-op	TCGA-EK-A2RB	F92A994D-B080-42C9-966F-34C1000865E3	Not Available	Not Available	Not Available	Not Applicable	Not Available	7	-17752	Not Applicable	Not Available	Not Available	Not Available	0	Not Available	9	0	Not Available
TCGA-JX-A3Q8	FEMALE	158	1357	68	27.2392	Endocervical Type of Adenocarcinoma	Cervical	Alive	T1b1	N0	MX	Stage IB1	G3	0	1357			TUMOR FREE		40	Not Available	Post operative visit	TCGA-JX-A3Q8	34629EB8-0C5E-4910-8E13-BF7D6A1E337F	Former User	ABSENT	Not Available	Not Applicable	Unknown	17	-14839	Not Applicable	Not Available	Not Available	32	0	Not Available	922	6	Not Available
TCGA-VS-A9UR	FEMALE	161	793	64	24.6904	Mucinous Adenocarcinoma of Endocervical Type	Cervical	Alive	T2a	NX	MX	Stage IIA	GX	1	675	Other, specify	Distant Metastasis	TUMOR FREE		53	Not Available	Not Applicable	TCGA-VS-A9UR	ADC60720-AC20-4E73-9C37-3AD3119C07D6	Never Used	Not Available	Not Available	Not Applicable	Not Available	11	-19688	Not Applicable	Not Available	Not Available	Not Available	0	Not Available	455	0	Not Available					TCGA-VS-A9UR-D63470	5160FB3B-17E6-47A9-B589-32D895E197B2	Not Available	11	90
TCGA-DS-A1O9	FEMALE	132	266	32	18.3655	Cervical Squamous Cell Carcinoma	Cervical	Dead	T4	N0	M0	Stage IVA	G3	1				WITH TUMOR		75	Not Available	Not Applicable	TCGA-DS-A1O9	b8eae533-2ad6-4dcf-98af-0fe7ff23a879	Never Used	PRESENT	Not Available	Not Applicable	Positive vaginal margin	12	-27433	266	-18	Not Available	Not Available	0	Not Available	Not Available	10	Not Available		Bladder Absent;Extra-Pelvic Metastatic Disease Present;Parametrium Present;Paraaortic Nodes Absent;Pelvic Nodes Absent;Supraclavicular Absent
TCGA-C5-A1M8	FEMALE	163	919	75	28.2284	Cervical Squamous Cell Carcinoma	Cervical	Alive	T1b	N0	MX	Stage IB1	G2	0	919			TUMOR FREE		43	Not Available	Not Applicable	TCGA-C5-A1M8	110cd100-5730-4873-9fab-2ae6c8732062	Never Used	ABSENT	Not Available	margins free of tumor	Other Location, specify	19	-15848	Not Applicable	Not Available	4	Not Available	0	Not Available	919	Not Available	Not Available				Pelvic Nodes Present
TCGA-EK-A2RA	FEMALE	160	1246	72	28.125	Cervical Squamous Cell Carcinoma	Cervical	Alive	T2a2	N0	MX	Stage IIA2	G3	1				WITH TUMOR		74	41	Not Applicable	TCGA-EK-A2RA	ADA77320-FD05-4E43-BE72-864391044B35	Not Available	PRESENT	Not Available	Not Applicable	Not Available	4	-27209	Not Applicable	30	Not Available	Not Available	0	Not Available	302	0	Not Available
TCGA-DG-A2KK	FEMALE	157	2496	64	25.9645	Cervical Squamous Cell Carcinoma	Cervical	Alive	T1b1	N1	M0	Stage IIIB	G3	0	2496			TUMOR FREE		51	27	Not Applicable	TCGA-DG-A2KK	8DBCB17D-0396-4FAA-9B32-8E2566424BFF	Unknown	ABSENT	Not Available	Not involved	Other Location, specify	11	-18834	Not Applicable	Not Available	Not Available	Not Available	0	Not Available	1544	Not Available	Not Available		Bladder Absent;Unknown;Parametrium Absent;Unknown;Pelvic Nodes Present		Bladder Absent;Unknown;Parametrium Absent;Unknown;Pelvic Nodes Present;Unknown	TCGA-DG-A2KK-D49823	C7F19426-0D49-41B9-AF8D-EBE3FA652802	Not Available	11	149
TCGA-LP-A7HU	FEMALE	155	406	58	24.1415	Endocervical Type of Adenocarcinoma	Cervical	Alive	T2	N0	M0	Stage II	G3	0	406			TUMOR FREE		53	Not Available	Not Applicable	TCGA-LP-A7HU	7067B7DA-FB1B-4827-8FE6-9433ED672D3B	Never Used	ABSENT	Not Available	Not Applicable	Not Available	3	-19595	Not Applicable	Not Available	Not Available	Not Available	0	Not Available	6	Not Available	Not Available
TCGA-VS-AA62	FEMALE	156	469	67	27.5312	Cervical Squamous Cell Carcinoma	Cervical	Dead	T2b	NX	MX	Stage IIB	G2	0	469			WITH TUMOR		51	Not Available	Not Applicable	TCGA-VS-AA62	173174F8-9D95-40B0-9F88-A4BF4CCB521B	Current User	Not Available	Not Available	Not Applicable	Not Available	13	-18792	469	Not Available	Not Available	Not Available	0	Not Available	Not Available	-1	Not Available					TCGA-VS-AA62-D68117	98AE48EA-B27C-4014-8A6C-E1759052C4A4	Not Available	13	64
TCGA-ZJ-AAXU	FEMALE	165	5	70	25.7117	Cervical Squamous Cell Carcinoma	Cervical	Alive	T2b	N0	M0	Stage IIB	G2	0	5			Unknown		51	15	Not Applicable	TCGA-ZJ-AAXU	DDD4B6D2-5BE0-4EDD-977A-A795EEA3C738	Unknown	Not Available	Not Available	Not Applicable	Not Available	19	-18773	Not Applicable	Not Available	Not Available	Not Available	0	Not Available	5	Not Available	Not Available
TCGA-VS-A94Y	FEMALE	154	144	44	18.5529	Cervical Squamous Cell Carcinoma	Cervical	Dead	T2b	NX	MX	Stage IIB	GX	0	144			WITH TUMOR		47	44	Not Applicable	TCGA-VS-A94Y	0E7F79CD-D188-42EA-BF96-4BA9E9B8606B	Current User	Not Available	Not Available	Not Applicable	Not Available	27	-17465	144	Not Available	Not Available	Not Available	0	Not Available	Not Available	1	Not Available					TCGA-VS-A94Y-D62789	6D107EBB-1755-4A7C-9A3A-21A49777DDFB	Not Available	24	104
TCGA-EK-A2PM	FEMALE	157	18	51	20.6905	Cervical Squamous Cell Carcinoma	Cervical	Alive				Stage IIB	G3	0	18			WITH TUMOR		81	Not Available	Not Applicable	TCGA-EK-A2PM	085FB6D8-6265-484E-9307-8292386714B7	Not Available	Not Available	Not Available	Not Applicable	Not Available	2	-29747	Not Applicable	Not Available	Not Available	Not Available	0	Not Available	0	0	Not Available
TCGA-Q1-A73Q	FEMALE	158	284	87	34.8502	Cervical Squamous Cell Carcinoma	Cervical	Alive	TX	NX	MX	Stage I	GX	1				Unknown		46	13	Not Applicable	TCGA-Q1-A73Q	5C72BDA2-2EC0-455F-AB27-7247FD5FFFF9	Unknown	Not Available	Not Available	Not Applicable	Not Available	31	-16851	Not Applicable	Not Available	Not Available	Not Available	0	Not Available	179	179	Not Available					TCGA-Q1-A73Q-D50823	9AAD51FE-13BD-4BFC-BE91-D2006570638D	Not Available	31	45
TCGA-JW-A5VI	FEMALE	158	747	59	23.634	Cervical Squamous Cell Carcinoma	Cervical	Alive	T2b	NX	MX	Stage IIB	G3	1	558	Lung	Distant Metastasis	WITH TUMOR		45	26	Not Available	TCGA-JW-A5VI	53EB4C4E-0719-476F-9B2B-279D438D7710	Former User	Not Available	Not Available	Not Applicable	Not Available	3	-16444	Not Applicable	6	Not Available	Not Available	0	Not Available	506	6	Not Available		Bladder Absent;Extra-Pelvic Metastatic Disease Absent;Parametrium Present;Pelvic Nodes Present			TCGA-JW-A5VI-D45006	C5AD3DD1-DB8E-4106-97BE-4CA01A2B0480	Not Available	16	623
TCGA-EK-A2PK	FEMALE	167	12	94	33.705	Cervical Squamous Cell Carcinoma	Cervical	Alive				Stage IB1	G3	0	12			TUMOR FREE		43	Not Available	Not Applicable	TCGA-EK-A2PK	0809BA8B-4AB6-4F43-934C-C1CCBC014A7E	Not Available	Not Available	Not Available	Not Applicable	Not Available	8	-15939	Not Applicable	Not Available	Not Available	Not Available	0	Not Available	0	0	Not Available
TCGA-DR-A0ZM	FEMALE	158	1791	64	25.6369	Cervical Squamous Cell Carcinoma	Cervical	Alive	T2b	N0	M0	Stage IIIB	G2	0	1791			TUMOR FREE		61	30	Not Applicable	TCGA-DR-A0ZM	748aada0-448f-4523-9893-3d9618fdbe18	Former User	PRESENT	Not Available	Patient had clear margins	Other Location, specify	28	-22464	Not Applicable	8	519	521	0	Not Available	1289	8	Not Available		Bladder Absent;Extra-Pelvic Metastatic Disease Absent;Parametrium Absent;Paraaortic Nodes Absent;Pelvic Nodes Absent;Supraclavicular Absent		Bladder Absent;Extra-Pelvic Metastatic Disease Absent;Parametrium Absent;Paraaortic Nodes Absent;Pelvic Nodes Absent;Supraclavicular Absent	TCGA-DR-A0ZM-D17118	D926B906-4EC1-4D19-974E-E852936E646C	Not Available	28	Not Available
TCGA-C5-A902	FEMALE	177	149	83	26.493	Cervical Squamous Cell Carcinoma	Cervical	Alive				Stage IB2	G3	0	149			TUMOR FREE		35	14	Not Applicable	TCGA-C5-A902	010A807F-9DC0-4E14-9533-DCF478F3D947	Not Available	Not Available	Not Available	Not Applicable	Not Available	17	-12959	Not Applicable	Not Available	Not Available	Not Available	0	Not Available	149	Not Available	Not Available					TCGA-C5-A902-D58629	ED865073-B057-42DB-9EA8-5D0B20B591E9	Not Available	17	Not Available
TCGA-GH-A9DA	FEMALE	170	540	Not Available		Cervical Squamous Cell Carcinoma	Cervical	Alive	T1b	N0	MX	Stage IB1	G3	0	540			TUMOR FREE		27	14	Not Applicable	TCGA-GH-A9DA	67195401-9099-4CA9-9790-F42BCB815289	Unknown	ABSENT	Not Available	Not Applicable	Not Available	7	-10160	Not Applicable	Not Available	Not Available	42	0	Not Available	274	Not Available	Not Available
TCGA-EA-A50E	FEMALE	152	227	45	19.4771	Cervical Squamous Cell Carcinoma	Cervical	Dead	T4	N1	M0	Stage IVA	G2	1	208	Vulva	Locoregional Recurrence	WITH TUMOR		45	Not Available	Not Applicable	TCGA-EA-A50E	6A18D184-D3A2-49C2-BD4B-9C18F91B98C7	Former User	PRESENT	Pelvic spread	Not Applicable	Positive bladder margin	27	-16609	Not Applicable	-1	Not Available	Not Available	0	Not Available	8	Not Available	Not Available
TCGA-VS-A952	FEMALE	155	1778	65	27.0552	Mucinous Adenocarcinoma of Endocervical Type	Cervical	Alive	T1b	N0	MX	Stage IB1	G2	0	1778			TUMOR FREE		66	Not Available	Not Applicable	TCGA-VS-A952	9FA42FE6-CCD0-4850-B08B-97B20ECEB8DF	Never Used	Not Available	Not Available	Not Applicable	Not Available	21	-24345	Not Applicable	Not Available	Not Available	Not Available	0	Not Available	1365	0	Not Available
TCGA-EK-A2RK	FEMALE	165	13	101	37.0983	Cervical Squamous Cell Carcinoma	Cervical	Alive	T1b1	N0	MX	Stage IA2	G3	0	13			Not Available		67	Not Available	Not Applicable	TCGA-EK-A2RK	ACBFEB99-2B6B-4232-9AB5-A58549C6BC3A	Not Available	Not Available	Not Available	Not Applicable	Positive vaginal margin	2	-24541	Not Applicable	Not Available	Not Available	Not Available	0	Not Available	13	0	Not Available
TCGA-EA-A44S	FEMALE	182	369	83	25.0574	Cervical Squamous Cell Carcinoma	Cervical	Alive	T2a2	N1	M0	Stage IIIB	G2	0	369			TUMOR FREE		31	Not Available	Not Applicable	TCGA-EA-A44S	CFB61FD8-0BCA-40B4-878C-CC914A289792	Never Used	ABSENT	Not Available	Not Applicable	Not Available	19	-11621	Not Applicable	Not Available	Not Available	Not Available	0	Not Available	9	9	Not Available					TCGA-EA-A44S-D49901;TCGA-EA-A44S-D49902;TCGA-EA-A44S-D49903;TCGA-EA-A44S-D49905;TCGA-EA-A44S-D49907	354F8B4C-1002-4F0A-B507-FAD0C8C1C3A5;051D1E1E-D001-4288-B8F9-C4119DC36A1A;D4AEB293-B03B-47C2-A043-2EF0415A0447;B4FFE834-F2D2-4DB7-8EF5-4FD29B245D21;C564DE36-51A0-4F7B-AE3D-900803489E96	Not Available;Not Available;Not Available;Not Available;Not Available	14;14;14;14;14	155;155;369;369;369
TCGA-IR-A3LK	FEMALE	165	908	96	35.2617	Cervical Squamous Cell Carcinoma	Cervical	Dead	T1b2	N0	M0	Stage IB2	G3	1	574	Other, specify	Distant Metastasis	WITH TUMOR		69	Not Available	Not Applicable	TCGA-IR-A3LK	B79558C5-1DB2-4B1E-A7B8-EFBD19AA855E	Never Used	ABSENT	Not Available	Not Applicable	Microscopic parametrial involvement	13	-25440	Not Applicable	Not Available	Not Available	Not Available	0	Not Available	808	Not Available	Not Available					TCGA-IR-A3LK-D38335;TCGA-IR-A3LK-D38336;TCGA-IR-A3LK-D38337	E502C966-183F-4170-A354-B67DE0DE5D91;BAB25380-1F3B-440A-95A3-4698D5A3EC9C;8ADC65C5-06CD-4C1A-8D30-394CAA5648CB	Not Available;Not Available;Not Available	14;14;14	101;707;707
TCGA-DR-A0ZL	FEMALE	155	2669	57	23.7253	Cervical Squamous Cell Carcinoma	Cervical	Alive	T1b1	N0	M0	Stage IB	G3	0	2669			TUMOR FREE		53	Not Available	Not Applicable	TCGA-DR-A0ZL	36605f5f-245c-41e5-a9db-705373da7923	Never Used	ABSENT	Not Available	Not Applicable	Not Available	28	-19384	Not Applicable	9	Not Available	Not Available	0	Not Available	2155	Not Available	Not Available		Bladder Absent;Extra-Pelvic Metastatic Disease Absent;Parametrium Absent;Paraaortic Nodes Absent;Pelvic Nodes Absent;Supraclavicular Absent
TCGA-VS-A9V2	FEMALE	156	555	49	20.1348	Cervical Squamous Cell Carcinoma	Cervical	Alive	T1b	N0	MX	Stage IB1	G2	0	555			TUMOR FREE		29	Not Available	Not Applicable	TCGA-VS-A9V2	03804F9B-DF7C-462C-8984-8EB3A5ED4999	Never Used	Not Available	Not Available	Not Applicable	Not Available	5	-10637	Not Applicable	Not Available	Not Available	Not Available	0	Not Available	237	-1	Not Available
TCGA-EX-A69M	FEMALE	158	253	58	23.2335	Cervical Squamous Cell Carcinoma	Cervical	Dead	T1b2	N0	M0	Stage IB2	G3	1	77	Lung	New Primary Tumor	TUMOR FREE		62	Not Available	Not Applicable	TCGA-EX-A69M	1E4D7755-B971-4C6E-A2B9-DD83D92BC4C9	Never Used	Not Available	Not Available	Not Applicable	Not Available	19	-22917	Not Applicable	Not Available	Not Available	18	0	Not Available	186	Not Available	Not Available
TCGA-EA-A439	FEMALE	160	965	47	18.3594	Cervical Squamous Cell Carcinoma	Cervical	Alive	T2a1	N0	M0	Stage IIA1	G3	1	316	Cervix	Locoregional Recurrence	TUMOR FREE		50	Not Available	Not Applicable	TCGA-EA-A439	3EDB62C1-25AD-4DEB-A005-E881A887D06A	Not Available	PRESENT	No pelvic spread	Not Applicable	Not Available	20	-18529	Not Applicable	12	Not Available	Not Available	0	Not Available	20	Not Available	Not Available		Extra-Pelvic Metastatic Disease Absent;Parametrium Absent;Paraaortic Nodes Absent;Pelvic Nodes Absent
TCGA-HG-A2PA	FEMALE	164	773	95	35.3212	Cervical Squamous Cell Carcinoma	Cervical	Alive	T1b2	N0	M0	Stage IB2	G2	1		Other, specify	Locoregional Recurrence	WITH TUMOR		38	Not Available	Not Applicable	TCGA-HG-A2PA	E2FF7CFD-A101-45B9-895F-26F403E7BDFB	Not Available	PRESENT	Not Available	Not Applicable	Not Available	23	-14025	Not Applicable	2	Not Available	Not Available	0	Not Available	773	21	Not Available		Bladder Absent;Parametrium Absent;Paraaortic Nodes Absent;Pelvic Nodes Present;Supraclavicular Absent			TCGA-HG-A2PA-D33512;TCGA-HG-A2PA-D33513	EE17B0E2-CE3E-43C0-80C9-57134F94BA7C;D5B1F254-E5C8-48D9-9402-A558837BF830	Not Available;Not Available	5;5	Not Available;Not Available
TCGA-EK-A2PL	FEMALE	167	13	113	40.5178	Cervical Squamous Cell Carcinoma	Cervical	Alive				Stage IIIB	Not Available	0	13			WITH TUMOR		36	Not Available	Not Applicable	TCGA-EK-A2PL	45CADCF3-EA98-4063-9255-5C18D6A5CBAB	Not Available	Not Available	Not Available	Not Applicable	Not Available	2	-13384	Not Applicable	Not Available	Not Available	Not Available	0	Not Available	0	0	Not Available
TCGA-C5-A1MI	FEMALE	Not Available	1083	77		Cervical Squamous Cell Carcinoma	Cervical	Dead	T1b1	N1	M0	Stage IB1	G2	1	805	Other, specify	Distant Metastasis	WITH TUMOR		50	15	Not Applicable	TCGA-C5-A1MI	941f75a1-fea4-4539-ba69-60bb11608f6d	Not Available	ABSENT	Not Available	Not Applicable	Not Available	19	-18336	1083	16	Not Available	23	0	Not Available	Not Available	Not Available	Not Available		Bladder Absent;Extra-Pelvic Metastatic Disease Absent;Parametrium Absent;Paraaortic Nodes Absent;Pelvic Nodes Absent;Supraclavicular Absent			TCGA-C5-A1MI-D29734;TCGA-C5-A1MI-D29735	808E6711-8841-41A0-8B0F-DA0DD4B537CC;DFEB8D3B-38B3-424F-B0C9-9586D927E8D1	Not Available;Not Available	28;28	118;Not Available
TCGA-EX-A1H6	FEMALE	158	241	74	29.6427	Endocervical Type of Adenocarcinoma	Cervical	Alive	T1b1	N0	MX	Stage IB1	G1	0	241			TUMOR FREE		38	Not Available	Not Applicable	TCGA-EX-A1H6	1FE594D9-4240-49EE-8AFD-C7D16A377181	Current User	ABSENT	Not Available	Not Applicable	Not Available	25	-14214	Not Applicable	24	Not Available	Not Available	0	Not Available	241	Not Available	Not Available		Bladder Absent;Extra-Pelvic Metastatic Disease Absent;Parametrium Absent;Paraaortic Nodes Absent;Pelvic Nodes Absent
TCGA-WL-A834	FEMALE	162	791	79	30.1021	Cervical Squamous Cell Carcinoma	Cervical	Alive	T1b1	N1			G3	0	791			TUMOR FREE		57	43	Not Applicable	TCGA-WL-A834	48D81B1E-CD75-4B55-A0B2-C331BE2A88AE	Former User	Not Available	Not Available	Not Applicable	Microscopic parametrial involvement	6	Not Available	Not Applicable	0	0	Not Available	0	Not Available	549	Not Available	Not Available		Bladder Absent;Extra-Pelvic Metastatic Disease Absent;Parametrium Absent;Paraaortic Nodes Absent;Pelvic Nodes Absent;Supraclavicular Absent		Bladder Absent;Extra-Pelvic Metastatic Disease Absent;Parametrium Absent;Paraaortic Nodes Absent;Pelvic Nodes Absent;Supraclavicular Absent	TCGA-WL-A834-D57161;TCGA-WL-A834-D57162;TCGA-WL-A834-D59852	8DFC71FE-774C-44C3-A87B-0B7EA8DBCE27;F7763EE1-727F-4DC9-815E-8C90D2949DD2;C4A9B575-CD38-4852-9E4E-DEA6B8843115	Not Available;Not Available;Not Available	19;19;19	Not Available;92;Not Available
TCGA-C5-A1BE	FEMALE	149	2094	76	34.2327	Cervical Squamous Cell Carcinoma	Cervical	Dead	T1b	N1	MX	Stage IB2	G2	1	1674			WITH TUMOR		64	Not Available	Not Applicable	TCGA-C5-A1BE	2b6d2c15-8bcc-41ab-84d6-601442f4378b	Not Available	PRESENT	Not Available	Anterior lower uterine segment	Other Location, specify	12	-23727	2094	Not Available	Not Available	Not Available	0	Not Available	Not Available	Not Available	Not Available					TCGA-C5-A1BE-D30508;TCGA-C5-A1BE-D30509	778DACD3-1169-4B7A-8A3B-E324986427D3;A715C97A-30BE-41EA-8E32-FC40D47180B1	Not Available;Not Available	11;11	Not Available;Not Available
TCGA-C5-A1BN	FEMALE	163	166	68	25.5937	Cervical Squamous Cell Carcinoma	Cervical	Dead				Stage IB2	G3	1				WITH TUMOR		26	15	Not Applicable	TCGA-C5-A1BN	8a4da4f0-30f2-497e-8a7c-988fd6b813cb	Never Used	Not Available	Not Available	Not Applicable	Not Available	21	-9783	166	Not Available	Not Available	1	0	Not Available	Not Available	Not Available	Not Available					TCGA-C5-A1BN-D30415	79519932-2069-4484-8A3C-2B29A74C417D	Not Available	9	67
TCGA-Q1-A6DT	FEMALE	Not Available	275	Not Available		Cervical Squamous Cell Carcinoma	Cervical	Dead	TX	NX	MX	Stage I	GX	1				WITH TUMOR		55	Not Available	Not Applicable	TCGA-Q1-A6DT	46ADFBBE-3ADD-41CD-A388-B1EE0790BF62	Unknown	Not Available	Not Available	Not Applicable	Not Available	20	-20286	Not Applicable	Not Available	Not Available	Not Available	0	Not Available	103	Not Available	Not Available
TCGA-Q1-A73O	FEMALE	152	428	76	32.8947	Cervical Squamous Cell Carcinoma	Cervical	Alive	TX	NX	MX	Stage IB2	GX	0	428			Unknown		37	Not Available	Not Applicable	TCGA-Q1-A73O	D0CBE668-5C95-4261-A1E8-CEF55093A0F7	Unknown	ABSENT	Not Available	Not Applicable	Not Available	31	-13601	Not Applicable	Not Available	Not Available	Not Available	0	Not Available	146	146	Not Available					TCGA-Q1-A73O-D50840	0CBEB31F-1EFD-41EB-8D76-26FF440332EA	Not Available	31	89
TCGA-VS-A94X	FEMALE	158	506	42	16.8242	Cervical Squamous Cell Carcinoma	Cervical	Dead	T2b	NX	MX	Stage IIB	G2	0	506			WITH TUMOR		40	Not Available	Not Applicable	TCGA-VS-A94X	240EF385-DECC-48F7-A798-A81B4AB0410E	Not Available	Not Available	Not Available	Not Applicable	Not Available	21	-14955	506	Not Available	Not Available	Not Available	0	Not Available	Not Available	0	Not Available					TCGA-VS-A94X-D62787	85118345-207B-43EC-A69C-E16BD65A1EA5	Not Available	24	92
TCGA-C5-A3HF	FEMALE	Not Available	543	Not Available		Mucinous Adenocarcinoma of Endocervical Type	Cervical	Dead				Stage IB2	G2	1	450	Other, specify	Distant Metastasis	WITH TUMOR		24	16	Not Applicable	TCGA-C5-A3HF	085DF27C-9BC2-425A-9A49-547D692EA028	Not Available	Not Available	Not Available	Not Applicable	Not Available	16	-9115	543	Not Available	Not Available	Not Available	0	Not Available	Not Available	Not Available	Not Available
TCGA-EK-A2RO	FEMALE	168	2	77	27.2817	Cervical Squamous Cell Carcinoma	Cervical	Alive				Stage IIB	G1	0	2			WITH TUMOR		59	Not Available	Not Applicable	TCGA-EK-A2RO	C996CFFB-8132-4973-987D-143274B6A081	Not Available	Not Available	Not Available	Not Applicable	Not Available	5	-21844	Not Applicable	Not Available	Not Available	-11	0	Not Available	2	1	Not Available
TCGA-VS-A950	FEMALE	165	1221	57	20.9366	Cervical Squamous Cell Carcinoma	Cervical	Alive	T3a	NX	MX	Stage IIIA	G3	1				WITH TUMOR		42	Not Available	Not Applicable	TCGA-VS-A950	3D190F07-2F79-4EE6-9F63-0B563DC05C74	Never Used	Not Available	Not Available	Not Applicable	Not Available	1	-15365	Not Applicable	Not Available	Not Available	Not Available	0	Not Available	967	0	Not Available
TCGA-LP-A4AW	FEMALE	158	27	52	20.83	Cervical Squamous Cell Carcinoma	Cervical	Alive	T1b	N0	M0	Stage IA	G1	0	27			TUMOR FREE		52	Not Available	Not Applicable	TCGA-LP-A4AW	74E47DED-2C00-4455-AAA6-CD662DFBF05E	Unknown	Not Available	Not Available	Not Applicable	Not Available	12	-19079	Not Applicable	Not Available	Not Available	Not Available	0	Not Available	27	Not Available	Not Available
TCGA-VS-A9UC	FEMALE	153	825	76	32.4661	Cervical Squamous Cell Carcinoma	Cervical	Alive	T2b	NX	MX	Stage IIB	G2	1				WITH TUMOR		32	Not Available	Not Applicable	TCGA-VS-A9UC	CCA23650-1B06-4977-91E8-F35E73E70C48	Never Used	Not Available	Not Available	Not Applicable	Not Available	11	-11790	Not Applicable	Not Available	Not Available	Not Available	0	Not Available	511	-2	Not Available					TCGA-VS-A9UC-D63478	C0D9120A-6CA4-4746-997B-0B828C421848	Not Available	11	203
TCGA-UC-A7PF	FEMALE	Not Available	2859	210		Cervical Squamous Cell Carcinoma	Cervical	Dead	T1b1	N1	M0	Stage IB1	G2	0	2859			Unknown		44	Not Available	Not Applicable	TCGA-UC-A7PF	1451821E-DD49-41FA-A52E-32F8524FFE82	Unknown	PRESENT	Not Available	Not Applicable	Not Available	4	-16412	2859	Not Available	Not Available	Not Available	0	Not Available	Not Available	Not Available	Not Available
TCGA-VS-A9UQ	FEMALE	160	1263	72	28.125	Mucinous Adenocarcinoma of Endocervical Type	Cervical	Alive	T1b	N0	MX	Stage IB	G2	1	561	Other, specify	Distant Metastasis	TUMOR FREE		32	Not Available	Not Applicable	TCGA-VS-A9UQ	2C600A58-98ED-4572-9B6F-EDBA2719790C	Current User	Not Available	Not Available	Not Applicable	Not Available	11	-11853	Not Applicable	Not Available	Not Available	Not Available	0	Not Available	920	Not Available	Not Available
TCGA-MY-A5BF	FEMALE	170	634	74	25.6055	Cervical Squamous Cell Carcinoma	Cervical	Alive	T2a2	N0	MX	Stage IIA2	G1	0	634			TUMOR FREE		68	Not Available	Not Applicable	TCGA-MY-A5BF	4F4E8834-A716-42E6-BD51-60D80A619202	Not Available	Unknown	Not Available	Not Applicable	Not Available	20	-25082	Not Applicable	Not Available	Not Available	Not Available	0	Not Available	132	Not Available	Not Available					TCGA-MY-A5BF-D67173	F8BD8AE2-4E5B-4FC7-895D-D907C6A45730	Not Available	31	188
TCGA-C5-A901	FEMALE	166	518	54	19.5965	Cervical Squamous Cell Carcinoma	Cervical	Alive	TX	N1	MX		G2	0	518			TUMOR FREE		44	Not Available	Not Applicable	TCGA-C5-A901	E8F07D20-D043-4C69-8898-87D0F0FC5A9A	Not Available	Not Available	Not Available	Not Applicable	Positive vaginal margin	1	-16186	Not Applicable	Not Available	Not Available	Not Available	0	Not Available	518	Not Available	Not Available
TCGA-JW-A5VJ	FEMALE	155	652	57	23.7253	Cervical Squamous Cell Carcinoma	Cervical	Alive	T2b	NX	MX	Stage IIB	G3	1	267	Head & Neck	Distant Metastasis	WITH TUMOR		56	Not Available	Not Applicable	TCGA-JW-A5VJ	F0BB0D18-1190-463D-A0BA-839C2C776794	Never Used	Not Available	Not Available	Not Applicable	Not Available	3	-20714	Not Applicable	0	Not Available	Not Available	0	Not Available	401	7	Not Available		Paraaortic Nodes Present;Pelvic Nodes Present
TCGA-DS-A7WF	FEMALE	160	492	63	24.6094	Adenosquamous	Cervical	Dead	T1b2	N0	MX	Stage IB2	G3	1	321	Lung	Distant Metastasis	WITH TUMOR		41	Not Available	Not Applicable	TCGA-DS-A7WF	D02FFAA9-0403-4A89-BE01-CCE35C80DD69	Never Used	Not Available	Not Available	Not Applicable	Not Available	23	-15319	492	Not Available	Not Available	Not Available	0	Not Available	Not Available	Not Available	Not Available					TCGA-DS-A7WF-D54752	6BBFFE71-CD5D-4340-89B0-709C35F6FA63	Not Available	23	397
TCGA-VS-A8QA	FEMALE	160	1099	67	26.1719	Cervical Squamous Cell Carcinoma	Cervical	Alive	T1b1	N0	MX	Stage IB1	GX	0	1099			TUMOR FREE		44	Not Available	Not Applicable	TCGA-VS-A8QA	1A3D5555-7013-4F06-878A-98944F075B63	Unknown	Not Available	Not Available	Not Applicable	Positive vaginal margin	30	-16072	Not Applicable	Not Available	Not Available	Not Available	0	Not Available	708	0	Not Available
TCGA-VS-A8EC	FEMALE	154	1415	46	19.3962	Cervical Squamous Cell Carcinoma	Cervical	Alive	T3b	NX	M0	Stage IIIB	G2	0	1415			TUMOR FREE		55	Not Available	Not Applicable	TCGA-VS-A8EC	AFB5442E-0249-475B-8F82-CAE4E0268AD1	Former User	Not Available	Not Available	Not Applicable	Not Available	22	-20286	Not Applicable	Not Available	Not Available	Not Available	0	Not Available	1050	46	Not Available					TCGA-VS-A8EC-D61977;TCGA-VS-A8EC-D62009	E92C9CD5-FA20-429C-9D02-ED80C876D1CB;922C203B-1B73-4D57-906F-518241AC938B	Not Available;Not Available	10;10	617;617
TCGA-C5-A8ZZ	FEMALE	Not Available	636	Not Available		Cervical Squamous Cell Carcinoma	Cervical	Alive				Stage IIB	G2	0	636			TUMOR FREE		41	21	Not Applicable	TCGA-C5-A8ZZ	33BC6504-D9AB-4B64-A87C-012915F36644	Not Available	Not Available	Not Available	Not Applicable	Not Available	17	-15262	Not Applicable	Not Available	Not Available	Not Available	0	Not Available	636	Not Available	Not Available					TCGA-C5-A8ZZ-D58625	13436EC9-48A3-4CEB-9EFE-93F42CB6EA2D	Not Available	17	Not Available
TCGA-C5-A7UH	FEMALE	163	3988	56	21.0772	Cervical Squamous Cell Carcinoma	Cervical	Alive				Stage IIIB	G3	0	3988			TUMOR FREE		55	Not Available	Not Applicable	TCGA-C5-A7UH	8328925E-3324-4188-85F1-6FFBF819D9E7	Former User	Not Available	Not Available	Not Applicable	Not Available	3	-20189	Not Applicable	Not Available	Not Available	Not Available	0	Not Available	1846	Not Available	Not Available					TCGA-C5-A7UH-D57021	984C0FC8-5951-46F4-AF25-B8163F38204D	Not Available	28	Not Available
TCGA-HM-A4S6	FEMALE	152	454	101	43.7154	Cervical Squamous Cell Carcinoma	Cervical	Alive	T1b2	N1	MX	Stage IIIB	G3	0	454			TUMOR FREE		51	14	Not Applicable	TCGA-HM-A4S6	6BCF8B41-7ABC-4B6F-899A-1F67B4ADA765	Former User	ABSENT	Not Available	Squamous cell carcinoma in situ focallly extends to the cervical cuff margin(6-9 o'clock	Other Location, specify	27	-18903	Not Applicable	11	Not Available	24	0	Not Available	244	38	Not Available		Bladder Absent;Extra-Pelvic Metastatic Disease Absent;Parametrium Absent;Paraaortic Nodes Absent;Pelvic Nodes Absent;Unknown			TCGA-HM-A4S6-D42760	D3B2B9D8-5887-4271-8C20-F368C42E0097	Not Available	30	243
TCGA-C5-A3HE	FEMALE	Not Available	548	Not Available		Cervical Squamous Cell Carcinoma	Cervical	Alive	T1b2	N0	M0	Stage IB2	G3	1	252	Cervix	Locoregional Recurrence	Unknown		44	Not Available	Not Applicable	TCGA-C5-A3HE	BC63DD2A-B8F6-4B30-A8D7-CE193BCD17F1	Not Available	Not Available	Not Available	margins free of tumor	Other Location, specify	3	-16139	Not Applicable	Not Available	Not Available	Not Available	0	Not Available	548	Not Available	Not Available
TCGA-IR-A3LI	FEMALE	169	2493	71	24.8591	Endocervical Type of Adenocarcinoma	Cervical	Alive	T2b	N1	M1	Stage IVB	G2	0	2493			TUMOR FREE		48	Not Available	Not Applicable	TCGA-IR-A3LI	75BC22D8-738D-45F8-B6C0-C664F5FEF47C	Never Used	ABSENT	Not Available	Not Applicable	Microscopic parametrial involvement	13	-17741	Not Applicable	Not Available	Not Available	Not Available	0	Not Available	2445	Not Available	Not Available					TCGA-IR-A3LI-D38329;TCGA-IR-A3LI-D38330;TCGA-IR-A3LI-D38331;TCGA-IR-A3LI-D38332	6FD64D29-1926-459E-B5DA-816D3F97CCFE;F1DBA871-99FD-4D4C-AB21-A146ACDE4608;01E813AD-1807-4B08-BC61-73BEB8C5C916;2FAF8699-6739-49AC-85ED-333A8BA1E0CF	Not Available;Not Available;Not Available;Not Available	14;14;14;14	73;73;211;211
TCGA-VS-A8QF	FEMALE	159	1800	68	26.8977	Cervical Squamous Cell Carcinoma	Cervical	Alive	TX	NX	MX	Stage IIB	G2	0	1800			TUMOR FREE		42	12	Not Applicable	TCGA-VS-A8QF	21254CB0-68F3-4ECC-8D9A-73FB0E994C5B	Unknown	Not Available	Not Available	Not Applicable	Not Available	30	-15374	Not Applicable	Not Available	Not Available	Not Available	0	Not Available	1507	92	Not Available					TCGA-VS-A8QF-D62000	E09A597F-8072-47C3-BAA2-520E63D22AAA	Not Available	10	118
TCGA-EK-A2H1	FEMALE	160	799	62	24.2188	Cervical Squamous Cell Carcinoma	Cervical	Alive				Stage IB2	G3	0	799			TUMOR FREE		20	Not Available	Not Applicable	TCGA-EK-A2H1	690A7B2A-7DC5-4504-9372-70C8B55E81C7	Not Available	Not Available	Not Available	Not Applicable	Not Available	3	-7649	Not Applicable	Not Available	Not Available	Not Available	0	Not Available	799	44	Not Available					TCGA-EK-A2H1-D21355	47D3FA29-395F-42C6-9004-5FE997C50FD9	Not Available	10	70
TCGA-Q1-A73P	FEMALE	173	483	82	27.3982	Endocervical Type of Adenocarcinoma	Cervical	Alive	T1b	N0	MX	Stage IB1	G1	0	483			Unknown		45	Not Available	Not Applicable	TCGA-Q1-A73P	3A3A9B5E-12A1-41F5-A54C-D4C1E0ECCB9E	Former User	ABSENT	Not Available	Not Applicable	Not Available	31	-16450	Not Applicable	Not Available	Not Available	Not Available	0	Not Available	146	146	Not Available
TCGA-VS-A9UJ	FEMALE	Not Available	52	Not Available		Cervical Squamous Cell Carcinoma	Cervical	Dead	T2b	NX	MX	Stage IIB	GX	0	52			WITH TUMOR		55	Not Available	No treatment performed	TCGA-VS-A9UJ	78C62970-4B48-4DC4-9042-5F48F42818EC	Current User	Not Available	Not Available	Not Applicable	Not Available	9	-20264	52	Not Available	Not Available	Not Available	0	Not Available	Not Available	0	Not Available
TCGA-FU-A3NI	FEMALE	162	638	57	21.7193	Cervical Squamous Cell Carcinoma	Cervical	Dead	T1b1	N1	MX	Stage IB1	G2	0	638			TUMOR FREE		45	Not Available	Not Applicable	TCGA-FU-A3NI	DAC27C24-CDBF-4527-9214-178FDE3D098A	Not Available	Not Available	Not Available	Not Applicable	Not Available	17	-16533	Not Applicable	14	Not Available	Not Available	0	Not Available	44	Not Available	Not Available		Bladder Absent;Extra-Pelvic Metastatic Disease Absent;Parametrium Absent;Paraaortic Nodes Absent;Pelvic Nodes Absent;Supraclavicular Absent
TCGA-DS-A1OB	FEMALE	152	861	72	31.1634	Cervical Squamous Cell Carcinoma	Cervical	Dead	T1b2	N1	M0	Stage IB	G2	1	652	Head & Neck	Distant Metastasis	WITH TUMOR		45	Not Available	Not Applicable	TCGA-DS-A1OB	29a48c93-bade-4346-a901-de35a6537337	Never Used	ABSENT	Not Available	None	Other Location, specify	4	-16685	861	Not Available	Not Available	Not Available	0	Not Available	Not Available	29	Not Available					TCGA-DS-A1OB-D20933;TCGA-DS-A1OB-D20934;TCGA-DS-A1OB-D20935;TCGA-DS-A1OB-D20936;TCGA-DS-A1OB-D20938;TCGA-DS-A1OB-D20937;TCGA-DS-A1OB-D20939	D77BC3EB-E2ED-4F2E-9745-CC8A783CCA61;1CEA0147-C6E4-4882-9525-206987056730;7A4F7393-7B23-4A22-A621-AC7A98C0AB8F;4A846040-97B3-454E-A090-73D8365E21CF;EB18139A-43D7-4750-A63E-307C69FB7F89;E42B0F05-014E-43DA-B1F9-063B4E5E0C28;37C3D41D-9AF7-4B0A-84D2-94254659365C	Not Available;Not Available;Not Available;Not Available;Not Available;Not Available;Not Available	24;24;24;24;24;24;24	Not Available;Not Available;710;710;800;765;800
TCGA-BI-A20A	FEMALE	167	720	59	21.1553	Cervical Squamous Cell Carcinoma	Cervical	Alive	T1b1	N0	M0	Stage IB1	G3	0	720			TUMOR FREE		49	Not Available	Not Applicable	TCGA-BI-A20A	f40468de-3b86-4922-9951-f8ae28da6af0	Not Available	PRESENT	Not Available	Not Applicable	Microscopic parametrial involvement	5	-18215	Not Applicable	Not Available	Not Available	Not Available	0	Not Available	72	Not Available	Not Available
TCGA-FU-A3YQ	FEMALE	160	861	101	39.4531	Cervical Squamous Cell Carcinoma	Cervical	Alive	T1b1	N0	MX	Stage IB1	G1	0	861			Unknown		35	23	Not Applicable	TCGA-FU-A3YQ	6E01248B-C551-4F52-8066-CB2D26EB6394	Former User	Not Available	Not Available	Not Applicable	Not Available	4	-12816	Not Applicable	Not Available	Not Available	Not Available	0	Not Available	107	Not Available	Not Available
TCGA-VS-A94W	FEMALE	156	1243	79	32.4622	Cervical Squamous Cell Carcinoma	Cervical	Alive	T2b	N1	MX	Stage IIB	G2	0	1243			TUMOR FREE		39	Not Available	Not Applicable	TCGA-VS-A94W	2F6A0E87-1E6C-41F3-93E0-3E505FA654B0	Never Used	Not Available	Not Available	Not Applicable	Not Available	17	-14399	Not Applicable	Not Available	Not Available	Not Available	0	Not Available	879	0	Not Available					TCGA-VS-A94W-D70275	D1241E75-98C5-4EE9-AC69-D282F12CAE1D	Not Available	3	104
TCGA-FU-A40J	FEMALE	160	426	78	30.4688	Endocervical Type of Adenocarcinoma	Cervical	Alive	T2a1	N1	MX	Stage IIIB	G3	0	426			TUMOR FREE		38	Not Available	Not Applicable	TCGA-FU-A40J	63DCFA32-C69E-45AD-BEA3-AE672ACB11C6	Unknown	ABSENT	Not Available	Not Applicable	Not Available	4	-14182	Not Applicable	Not Available	10	Not Available	0	Not Available	41	Not Available	Not Available				Extra-Pelvic Metastatic Disease Absent;Parametrium Absent	TCGA-FU-A40J-D64220;TCGA-FU-A40J-D64221	7ADAFA1B-FAE9-4369-A13A-0D7734550AC0;CB60C6D5-AFC3-4B83-9DBF-D649951043AF	Not Available;Not Available	27;27	306;306
TCGA-EA-A5ZE	FEMALE	153	829	55	23.4952	Cervical Squamous Cell Carcinoma	Cervical	Alive	T1b1	N0	M0	Stage IB1	G3	1	425	Other, specify	Distant Metastasis	TUMOR FREE		54	Not Available	Not Applicable	TCGA-EA-A5ZE	5E39485A-AC6B-496D-9984-2EA8075F6A9B	Former User	ABSENT	Not Available	Not Applicable	Unknown	24	-19868	Not Applicable	Not Available	Not Available	Not Available	0	Not Available	22	Not Available	Not Available
TCGA-JW-A852	FEMALE	160	252	100	39.0625	Cervical Squamous Cell Carcinoma	Cervical	Dead	T2b	N1	MX	Stage IIB	G2	1	153		New Primary Tumor	Unknown		42	Not Available	Not Applicable	TCGA-JW-A852	7CC8F5BD-D2D3-44E9-AFF6-FE9C9C805938	Not Available	Not Available	Not Available	Not Applicable	Not Available	12	-15682	Not Applicable	-1	Not Available	6	0	Not Available	156	13	Not Available		Bladder Absent;Extra-Pelvic Metastatic Disease Absent;Parametrium Absent;Paraaortic Nodes Absent;Pelvic Nodes Present;Supraclavicular Absent
TCGA-EK-A3GM	FEMALE	150	0	83	36.8889	Endocervical Type of Adenocarcinoma	Cervical	Alive				Stage IIA	G2	0	0			Not Available		65	Not Available	Not Applicable	TCGA-EK-A3GM	CB780C10-8810-4384-B829-954AAB1C16C8	Not Available	ABSENT	Not Available	Not Applicable	Not Available	2	-23879	Not Applicable	Not Available	Not Available	Not Available	0	Not Available	0	0	Not Available
TCGA-C5-A2LY	FEMALE	160	2383	88	34.375	Cervical Squamous Cell Carcinoma	Cervical	Alive	T1b1	N0	M0	Stage IB1	G2	0	2383			TUMOR FREE		30	Not Available	Not Applicable	TCGA-C5-A2LY	E733F289-A0EC-478C-AAD9-1378AD26DDFA	Former User	ABSENT	Not Available	Not Applicable	Not Available	25	-11018	Not Applicable	12	Not Available	12	0	Not Available	2383	15	Not Available		Bladder Absent;Extra-Pelvic Metastatic Disease Absent;Parametrium Absent;Paraaortic Nodes Absent;Pelvic Nodes Present;Supraclavicular Absent			TCGA-C5-A2LY-D21305	9DC32BEE-25A6-48D6-A582-A6E165A5813B	Not Available	8	106
TCGA-ZJ-AAXA	FEMALE	155	43	78	32.4662	Cervical Squamous Cell Carcinoma	Cervical	Alive	T1b	N0	MX	Stage IB1	G2	0	43			Unknown		64	18	Not Applicable	TCGA-ZJ-AAXA	E8DE2228-3AAA-48AD-A2E4-2940280AF6FD	Unknown	Unknown	Not Available	Not Applicable	Unknown	30	-23603	Not Applicable	Not Available	Not Available	Not Available	0	Not Available	43	Not Available	Not Available
TCGA-C5-A7X3	FEMALE	160	284	79	30.8594	Cervical Squamous Cell Carcinoma	Cervical	Dead				Stage IIIB	G2	0	284			TUMOR FREE		70	Not Available	Not Applicable	TCGA-C5-A7X3	4ED1616E-8C62-4104-BCBE-26D7059F04D0	Never Used	Not Available	Not Available	Not Applicable	Not Available	3	-25665	284	Not Available	Not Available	Not Available	0	Not Available	Not Available	Not Available	Not Available					TCGA-C5-A7X3-D56994;TCGA-C5-A7X3-D56995;TCGA-C5-A7X3-D56996	C7862EF2-080F-499E-92D3-840E034090A5;319CE21B-32D0-4C7F-944E-E8EEFC7BB2A6;601CC8EB-C647-4BFB-930E-09527D09BDE9	Cisplatinum;5-flurouracil;Amifostine	28;28;28	26;26;16
TCGA-C5-A2LV	FEMALE	165	2234	84	30.854	Cervical Squamous Cell Carcinoma	Cervical	Alive	T1b	N1	MX	Stage IB	G3	0	2234			TUMOR FREE		36	20	Not Applicable	TCGA-C5-A2LV	00BCA18C-B3D4-45A3-8F19-034CC40449A4	Never Used	ABSENT	Not Available	margins free of tumor	Other Location, specify	8	-13447	Not Applicable	8	Not Available	Not Available	0	Not Available	2234	-1	Not Available		Bladder Absent;Extra-Pelvic Metastatic Disease Absent;Parametrium Absent;Paraaortic Nodes Absent;Pelvic Nodes Absent;Supraclavicular Absent
TCGA-C5-A8XH	FEMALE	163	1394	60	22.5827	Cervical Squamous Cell Carcinoma	Cervical	Dead	T1b1	N0	MX	Stage IB1	Not Available	0	1394			TUMOR FREE		39	Not Available	Not Applicable	TCGA-C5-A8XH	183E8D87-3476-46BC-A989-ED4B09809227	Not Available	Not Available	Not Available	margins free of tumor	Other Location, specify	17	-14444	1394	Not Available	Not Available	Not Available	0	Not Available	Not Available	Not Available	Not Available
TCGA-LP-A4AV	FEMALE	153	0	42	17.9418	Cervical Squamous Cell Carcinoma	Cervical	Alive	T1b	N0	M0	Stage IB	G2	0	0			TUMOR FREE		63	Not Available	Not Applicable	TCGA-LP-A4AV	F241D6B1-2C32-4478-8F8D-8C746464F7D1	Unknown	Not Available	Not Available	Not Applicable	Not Available	12	Not Available	Not Applicable	Not Available	Not Available	Not Available	0	Not Available	0	Not Available	Not Available
TCGA-LP-A5U3	FEMALE	160	25	50	19.5312	Cervical Squamous Cell Carcinoma	Cervical	Alive	T1b1	N0	M0	Stage IB1	G3	0	25			TUMOR FREE		40	Not Available	Not Applicable	TCGA-LP-A5U3	1399D31D-9D5E-441A-B400-8B8A92A6FF8B	Never Used	ABSENT	Not Available	Not Applicable	Not Available	3	-14698	Not Applicable	Not Available	Not Available	Not Available	0	Not Available	25	Not Available	Not Available
TCGA-FU-A5XV	FEMALE	157	321	69	27.993	Cervical Squamous Cell Carcinoma	Cervical	Alive	T1b2	N1	MX	Stage IIIB	G3	0	321			Unknown		32	14	Not Applicable	TCGA-FU-A5XV	9DBA5A81-3587-4F5A-8D19-E0B0AED0A677	Unknown	Unknown	Not Available	Not Applicable	Not Available	12	-11692	Not Applicable	Not Available	Not Available	Not Available	0	Not Available	60	55	Not Available
TCGA-MY-A5BE	FEMALE	157	1066	84	34.0785	Cervical Squamous Cell Carcinoma	Cervical	Alive	T1b1	N0	MX	Stage IB1	G3	0	1066			TUMOR FREE		42	Not Available	Not Applicable	TCGA-MY-A5BE	F8AB17EC-C365-41A6-A4BC-36653E84BCE5	Not Available	Unknown	Not Available	Not Applicable	Not Available	20	-15466	Not Applicable	Not Available	Not Available	Not Available	0	Not Available	2	Not Available	Not Available
TCGA-C5-A1BJ	FEMALE	169	4385	49	17.1563	Cervical Squamous Cell Carcinoma	Cervical	Alive				Stage IIB	G2	0	4385			TUMOR FREE		34	24	Not Applicable	TCGA-C5-A1BJ	7941d1c7-5319-4e8d-a15f-60b61cb68a9b	Not Available	Not Available	Not Available	Not Applicable	Not Available	13	-12611	Not Applicable	Not Available	Not Available	Not Available	0	Not Available	4385	Not Available	Not Available
TCGA-LP-A4AU	FEMALE	153	343	49	20.9321	Cervical Squamous Cell Carcinoma	Cervical	Alive	T2	N1	M0	Stage IIIB	G3	0	343			TUMOR FREE		35	Not Available	Not Applicable	TCGA-LP-A4AU	E15D92A1-6925-4B58-A494-D6F665F67B83	Unknown	Not Available	Not Available	Not Applicable	Unknown	12	-13074	Not Applicable	Not Available	Not Available	Not Available	0	Not Available	3	Not Available	Not Available					TCGA-LP-A4AU-D58086;TCGA-LP-A4AU-D58087	17273461-E423-4C32-93D2-7A05ABAEDB1C;36DCFD67-54B3-451B-BF22-25FE9393781B	Not Available;Not Available	31;31	307;307
TCGA-IR-A3LA	FEMALE	157	4172	101	40.9753	Endometrioid Adenocarcinoma of Endocervix	Cervical	Alive	T1b1	N0	M0	Stage IB1	G3	0	4172			TUMOR FREE		60	Not Available	Not Applicable	TCGA-IR-A3LA	7B8C04D7-824D-493D-8F2C-9ED87A907192	Never Used	ABSENT	Not Available	Not Applicable	Not Available	24	-21949	Not Applicable	Not Available	Not Available	Not Available	0	Not Available	3780	Not Available	Not Available					TCGA-IR-A3LA-D39484;TCGA-IR-A3LA-D39485	879222E5-1EFD-4436-A977-13BB90006308;B61E901D-3B92-401F-AC6A-999C175C46A5	Not Available;Not Available	24;24	148;151
TCGA-MU-A51Y	FEMALE	Not Available	854	31		Cervical Squamous Cell Carcinoma	Cervical	Alive	T2a1	N0	MX	Stage IIA1	G2	0	854			TUMOR FREE		27	Not Available	Not Applicable	TCGA-MU-A51Y	77DA506B-E726-409F-B3EB-D41242862982	Not Available	Not Available	Not Available	uninvolved margins	Other Location, specify	14	-10199	Not Applicable	Not Available	Not Available	52	0	Not Available	422	Not Available	Not Available
TCGA-FU-A3HZ	FEMALE	165	1103	66	24.2424	Cervical Squamous Cell Carcinoma	Cervical	Alive	T2a2	N0	M0	Stage IIA2	G3	0	1103			TUMOR FREE		64	Not Available	Not Applicable	TCGA-FU-A3HZ	6FF12A54-10DA-4941-BFEA-7B66E19B4BE9	Not Available	PRESENT	Not Available	Not Applicable	Not Available	16	-23565	Not Applicable	-7	Not Available	Not Available	0	Not Available	31	Not Available	Not Available		Bladder Absent;Extra-Pelvic Metastatic Disease Absent;Parametrium Absent;Pelvic Nodes Absent			TCGA-FU-A3HZ-D64229	11063673-DD72-418C-8090-19921AB04C0C	Not Available	27	114
TCGA-Q1-A73S	FEMALE	160	688	68	26.5625	Adenosquamous	Cervical	Alive	T1b1	N1	MX	Stage IB1	G2	0	688			Unknown		33	19	Not Applicable	TCGA-Q1-A73S	B0F63819-FC86-4981-9D92-0115C6DE3BCE	Former User	PRESENT	Not Available	Not Applicable	Not Available	31	-12229	Not Applicable	Not Available	Not Available	Not Available	0	Not Available	316	316	Not Available					TCGA-Q1-A73S-D50813	5017EAAD-0177-496C-A6DB-E916EE13386D	Not Available	31	76
TCGA-EX-A1H5	FEMALE	167	619	67	24.0238	Cervical Squamous Cell Carcinoma	Cervical	Alive	T2b	N1	MX	Stage IIB	G3	0	619			TUMOR FREE		58	33	Not Applicable	TCGA-EX-A1H5	6b74c07a-9932-4a80-8296-9db08d0c6964	Never Used	ABSENT	Not Available	Not Applicable	Microscopic parametrial involvement	21	-21338	Not Applicable	Not Available	Not Available	Not Available	0	Not Available	178	Not Available	Not Available
TCGA-MA-AA3Y	FEMALE	156	542	65	26.7094	Cervical Squamous Cell Carcinoma	Cervical	Alive	T1b1	N0	M0	Stage IB1	G3	0	542			TUMOR FREE		48	Not Available	Not Applicable	TCGA-MA-AA3Y	2F261704-D600-4226-90D5-D51BA416B55C	Never Used	ABSENT	negative	Not Applicable	Not Available	16	-17795	Not Applicable	20	Not Available	Not Available	0	Not Available	542	22	Not Available		Bladder Absent;Extra-Pelvic Metastatic Disease Absent;Parametrium Absent;Paraaortic Nodes Absent;Pelvic Nodes Absent;Supraclavicular Absent
TCGA-VS-A8EL	FEMALE	166	1992	78	28.306	Cervical Squamous Cell Carcinoma	Cervical	Alive	T2b	NX	M0	Stage IIB	G3	0	1992			TUMOR FREE		38	Not Available	Not Applicable	TCGA-VS-A8EL	E0A5D99B-B58B-4301-B2DC-A767D90059B1	Former User	Not Available	Not Available	Not Applicable	Not Available	22	-14162	Not Applicable	Not Available	Not Available	Not Available	0	Not Available	1628	-9	Not Available					TCGA-VS-A8EL-D64589	B38CCD33-80D7-4EDA-B3C7-28F024DC880D	Not Available	5	81
TCGA-FU-A57G	FEMALE	160	1078	57	22.2656	Endocervical Type of Adenocarcinoma	Cervical	Alive	T1b2	N0	MX	Stage IB2	G2	0	1078			TUMOR FREE		49	Not Available	Not Applicable	TCGA-FU-A57G	968BD652-786C-4DDB-A937-DC480CB821FC	Former User	ABSENT	Not Available	Not Applicable	Not Available	31	-17905	Not Applicable	Not Available	Not Available	Not Available	0	Not Available	40	40	Not Available
TCGA-C5-A2M1	FEMALE	168	1169	76	26.9274	Endocervical Type of Adenocarcinoma	Cervical	Alive	T1b1	N0	MX	Stage IB1	G2	0	1169			TUMOR FREE		37	Not Available	Not Applicable	TCGA-C5-A2M1	8911C80C-C903-48E4-AF5B-FFEDEF9ABC47	Former User	ABSENT	Not Available	margins free of tumor	Other Location, specify	8	-13835	Not Applicable	Not Available	Not Available	Not Available	0	Not Available	1169	13	Not Available
TCGA-R2-A69V	FEMALE	157	596	116	47.0607	Cervical Squamous Cell Carcinoma	Cervical	Alive	T1b	N0	M0	Stage IB	G3	0	596			TUMOR FREE		42	Not Available	Not Applicable	TCGA-R2-A69V	0E137272-A21C-4C5E-BFD1-A774B339A753	Unknown	ABSENT	Not Available	Not Applicable	Not Available	15	-15479	Not Applicable	Not Available	Not Available	15	0	Not Available	596	Not Available	Not Available					TCGA-R2-A69V-D58931	20E60A9F-1F04-4860-9614-D90A6622C0AC	Not Available	15	118
TCGA-DS-A0VM	FEMALE	163	3589	69	25.9701	Cervical Squamous Cell Carcinoma	Cervical	Alive	T1b1	N1	M0	Stage IB	G3	1	868	Lung	Distant Metastasis	TUMOR FREE		51	Not Available	Not Applicable	TCGA-DS-A0VM	ed6d989d-da09-4818-8fed-f33d88b628af	Former User	ABSENT	Not Available	No involved margins. Margins clear as per pathology report.	Other Location, specify	7	-18839	Not Applicable	1	Not Available	Not Available	0	Not Available	2128	0	Not Available		Bladder Absent;Extra-Pelvic Metastatic Disease Absent;Parametrium Absent;Paraaortic Nodes Absent;Pelvic Nodes Absent;Supraclavicular Absent			TCGA-DS-A0VM-D8642	1d3da5d7-7c94-4ba8-961d-d37ec233d318	Not Available	1	70
TCGA-FU-A23L	FEMALE	163	725	56	21.0772	Cervical Squamous Cell Carcinoma	Cervical	Alive	T2a1	N0	MX	Stage IIA1	G3	0	725			Not Available		60	Not Available	Not Applicable	TCGA-FU-A23L	86731af9-2d33-4521-9cf9-5f6152ca15d7	Not Available	PRESENT	Not Available	Not Applicable	Not Available	18	-21962	Not Applicable	Not Available	Not Available	Not Available	0	Not Available	37	Not Available	Not Available					TCGA-FU-A23L-D56155	74452C14-7355-4AD6-958B-BCB5BF4E44E9	Not Available	29	106
TCGA-ZJ-AAXT	FEMALE	165	0	76	27.9155	Cervical Squamous Cell Carcinoma	Cervical	Alive	T3b	N1	M0	Stage IIIB	G2	0	0			Unknown		54	20	Not Applicable	TCGA-ZJ-AAXT	5916AF71-0262-42CF-AF4B-EAC830A8B419	Unknown	Not Available	Not Available	Not Applicable	Not Available	31	-19847	Not Applicable	Not Available	Not Available	Not Available	0	Not Available	0	Not Available	Not Available
TCGA-VS-A9UD	FEMALE	161	739	64	24.6904	Cervical Squamous Cell Carcinoma	Cervical	Alive	T3a	NX	MX	Stage IIIA	G2	0	739			TUMOR FREE		73	Not Available	Not Applicable	TCGA-VS-A9UD	60CFA29F-4770-4EE4-AA37-787F53155662	Never Used	Not Available	Not Available	Not Applicable	Not Available	11	-26815	Not Applicable	Not Available	Not Available	Not Available	0	Not Available	417	-1	Not Available					TCGA-VS-A9UD-D63434	535F5BEE-B950-4EE1-89A0-C45F7565B1B7	Not Available	11	89
TCGA-IR-A3LC	FEMALE	160	3935	64	25	Cervical Squamous Cell Carcinoma	Cervical	Alive	T1b1	N0	M0	Stage IB1	G3	0	3935			TUMOR FREE		40	Not Available	Not Applicable	TCGA-IR-A3LC	58BDCACE-0047-456E-A225-68953EDAFE5E	Current User	ABSENT	Not Available	Not Applicable	Not Available	13	-14697	Not Applicable	Not Available	Not Available	Not Available	0	Not Available	3333	Not Available	Not Available					TCGA-IR-A3LC-D38296	A95DAC18-6883-4A30-9E1E-27551C9445B7	Not Available	14	Not Available
TCGA-EA-A43B	FEMALE	164	791	72	26.7698	Cervical Squamous Cell Carcinoma	Cervical	Alive	T1b1	N0	M0	Stage IB1	G2	0	791			TUMOR FREE		43	Not Available	Not Applicable	TCGA-EA-A43B	3265F9C1-7242-4C7D-B4AD-B6519EE94F84	Never Used	Not Available	Not Available	Not Applicable	Not Available	20	-15871	Not Applicable	36	Not Available	Not Available	0	Not Available	55	53	Not Available		Bladder Absent;Extra-Pelvic Metastatic Disease Absent;Parametrium Present;Paraaortic Nodes Absent;Pelvic Nodes Absent;Supraclavicular Absent			TCGA-EA-A43B-D58725;TCGA-EA-A43B-D58726	43CFF346-D800-4B3C-A1D3-FCF8590970A9;BD1405B3-FE04-4F41-8E66-1F933D432F75	Not Available;Not Available	22;22	70;70
TCGA-VS-A9UV	FEMALE	152	104	31	13.4176	Cervical Squamous Cell Carcinoma	Cervical	Dead	T4	NX	MX	Stage IVA	GX	0	104			WITH TUMOR		74	Not Available	The patient did not perform treatment	TCGA-VS-A9UV	C9E4BAC6-0CAC-4FCA-A548-527DEAC5B880	Never Used	Not Available	Not Available	Not Applicable	Not Available	11	-27348	104	Not Available	Not Available	Not Available	0	Not Available	Not Available	-2	Not Available
TCGA-ZJ-AAXN	FEMALE	173	0	59	19.7133	Cervical Squamous Cell Carcinoma	Cervical	Alive	T1b2	N1	M0	Stage IB2	Not Available	0	0			Unknown		34	21	Not Applicable	TCGA-ZJ-AAXN	5F22E050-C172-4F2D-A1F9-6CB749B6EF98	Unknown	Not Available	Not Available	Not Applicable	Not Available	31	-12701	Not Applicable	Not Available	Not Available	Not Available	0	Not Available	0	Not Available	Not Available
TCGA-EA-A3HQ	FEMALE	160	1136	88	34.375	Cervical Squamous Cell Carcinoma	Cervical	Alive	T2a	N0	M0	Stage II	G2	0	1136			TUMOR FREE		60	Not Available	Not Applicable	TCGA-EA-A3HQ	6BF00B63-89F8-420C-8D36-F680FB0908B1	Never Used	ABSENT	Not Available	Not Applicable	Not Available	17	-21966	Not Applicable	Not Available	Not Available	Not Available	0	Not Available	65	Not Available	Not Available
TCGA-EA-A411	FEMALE	176	747	74	23.8895	Cervical Squamous Cell Carcinoma	Cervical	Alive	T1b1	N0	M0	Stage IB1	G2	0	747			TUMOR FREE		50	Not Available	Not Applicable	TCGA-EA-A411	84CB84D0-7C7E-453C-8CC5-65B5AF941028	Former User	ABSENT	Not Available	Not Applicable	Not Available	24	-18561	Not Applicable	Not Available	Not Available	Not Available	0	Not Available	41	Not Available	Not Available
TCGA-EA-A3HU	FEMALE	162	1013	68	25.9107	Cervical Squamous Cell Carcinoma	Cervical	Alive	T2a2	N0	M0	Stage II	G2	0	1013			TUMOR FREE		43	Not Available	Not Applicable	TCGA-EA-A3HU	9912432E-74BC-4846-93B4-FA2BF8070BD1	Never Used	ABSENT	Not Available	Not Applicable	Not Available	17	-15909	Not Applicable	Not Available	Not Available	Not Available	0	Not Available	81	Not Available	Not Available
TCGA-C5-A905	FEMALE	Not Available	4879	73		Cervical Squamous Cell Carcinoma	Cervical	Alive	T1b	N0	MX	Stage IB	G2	0	4879			TUMOR FREE		37	Not Available	Not Applicable	TCGA-C5-A905	C99F476B-E8B1-4CDD-9164-0DA450064886	Not Available	Not Available	Not Available	Not Applicable	Not Available	1	-13584	Not Applicable	Not Available	Not Available	Not Available	0	Not Available	4879	Not Available	Not Available
TCGA-MA-AA3W	FEMALE	155	685	84	34.9636	Cervical Squamous Cell Carcinoma	Cervical	Alive	T1b1	N1	M0	Stage IB1	G3	0	685			TUMOR FREE		54	18	Not Applicable	TCGA-MA-AA3W	FC2BCE29-4685-49F5-B901-2117BF673BB8	Unknown	PRESENT	negative	Not Applicable	Not Available	15	-20066	Not Applicable	5	Not Available	65	0	Not Available	503	7	Not Available		Bladder Absent;Extra-Pelvic Metastatic Disease Absent;Parametrium Absent;Paraaortic Nodes Absent;Pelvic Nodes Absent;Supraclavicular Absent			TCGA-MA-AA3W-D64865	DE131EAB-9290-4833-8513-3BA191FBDDDC	Not Available	15	110
TCGA-EK-A3GK	FEMALE	165	15	73	26.8136	Endocervical Type of Adenocarcinoma	Cervical	Alive	T1b1	N0	MX	Stage IB1	G3	0	15			TUMOR FREE		33	Not Available	Not Applicable	TCGA-EK-A3GK	D07D0A56-A25E-426B-8384-9D49E6545527	Current User	ABSENT	Not Available	Not Applicable	Not Available	2	-12207	Not Applicable	Not Available	Not Available	Not Available	0	Not Available	15	0	Not Available
TCGA-EX-A69L	FEMALE	163	602	73	27.4756	Cervical Squamous Cell Carcinoma	Cervical	Alive	T1b1	N0	M0	Stage IB1	G3	0	602			TUMOR FREE		41	Not Available	Not Applicable	TCGA-EX-A69L	6DCA2A6F-7F2C-4524-B528-396A889B2A3F	Never Used	Not Available	Not Available	Not Applicable	Not Available	19	-15121	Not Applicable	11	Not Available	Not Available	0	Not Available	136	Not Available	Not Available		Bladder Absent;Extra-Pelvic Metastatic Disease Absent;Paraaortic Nodes Absent;Pelvic Nodes Absent;Unknown
TCGA-MU-A5YI	FEMALE	175	1053	101	32.9796	Cervical Squamous Cell Carcinoma	Cervical	Alive	T1a1	NX	MX	Stage IA1	G2	1	630	Other, specify	Distant Metastasis	TUMOR FREE		60	37	Not Applicable	TCGA-MU-A5YI	5E972E96-7271-439A-905C-6E308C1EF29E	Not Available	Unknown	Not Available	Not Applicable	Not Available	23	-21927	Not Applicable	Not Available	Not Available	Not Available	0	Not Available	1	Not Available	Not Available
TCGA-VS-A9UZ	FEMALE	149	2044	54	24.3232	Mucinous Adenocarcinoma of Endocervical Type	Cervical	Alive	T1b	N0	MX	Stage IB1	G2	0	2044			TUMOR FREE		61	Not Available	Not Applicable	TCGA-VS-A9UZ	6817BB3E-1F8A-457C-9AB0-31CCDA8B6868	Never Used	Not Available	Not Available	Not Applicable	Not Available	20	-22344	Not Applicable	Not Available	Not Available	Not Available	0	Not Available	1939	Not Available	Not Available
TCGA-EA-A3HR	FEMALE	146	940	86	40.3453	Cervical Squamous Cell Carcinoma	Cervical	Alive	T2a	N0	M0	Stage II	G2	0	940			TUMOR FREE		57	Not Available	Not Applicable	TCGA-EA-A3HR	638035F6-2909-4A44-980F-468AC5D74E18	Never Used	ABSENT	Not Available	Not Applicable	Not Available	20	-20980	Not Applicable	Not Available	Not Available	Not Available	0	Not Available	40	Not Available	Not Available
TCGA-HM-A3JJ	FEMALE	173	659	72	24.0569	Cervical Squamous Cell Carcinoma	Cervical	Dead	T1b1	N1	MX	Stage IB1	G3	1	385		Distant Metastasis	WITH TUMOR		40	Not Available	Not Applicable	TCGA-HM-A3JJ	F150D999-CDEC-427E-B8B2-00731C648989	Former User	Not Available	Not Available	Not Applicable	Not Available	12	-14736	659	13	Not Available	Not Available	0	Not Available	Not Available	26	Not Available		Bladder Absent;Extra-Pelvic Metastatic Disease Absent;Parametrium Absent;Paraaortic Nodes Absent;Pelvic Nodes Absent;Supraclavicular Absent			TCGA-HM-A3JJ-D29258	801FEF42-121B-46DF-ABD7-6CCECA54F4D8	Not Available	13	138
TCGA-ZJ-AAX8	FEMALE	Not Available	0	Not Available		Cervical Squamous Cell Carcinoma	Cervical	Alive	T3b	N1	M0	Stage IIIB	G2	0	0			Unknown		58	Not Available	Not Applicable	TCGA-ZJ-AAX8	B5F0E361-D67D-4FA9-9916-43623DAFB10F	Unknown	Not Available	Not Available	Not Applicable	Not Available	19	-21481	Not Applicable	Not Available	Not Available	Not Available	0	Not Available	0	Not Available	Not Available
TCGA-LP-A5U2	FEMALE	160	9	51	19.9219	Endocervical Adenocarcinoma of the Usual Type	Cervical	Alive	T2a	N1	MX	Stage IIIB	G3	0	9			TUMOR FREE		30	Not Available	Not Applicable	TCGA-LP-A5U2	1EF20703-3684-4B43-A31F-892073208377	Never Used	ABSENT	Not Available	Not Applicable	Not Available	3	-11049	Not Applicable	Not Available	Not Available	Not Available	0	Not Available	9	6	Not Available
TCGA-VS-A9UI	FEMALE	Not Available	1372	70		Cervical Squamous Cell Carcinoma	Cervical	Dead	T2b	NX	MX	Stage IIB	GX	0	1372			TUMOR FREE		76	Not Available	Not Applicable	TCGA-VS-A9UI	9C516D28-BEF2-4334-BDDA-97950BD95AC0	Never Used	Not Available	Not Available	Not Applicable	Not Available	11	-27838	Not Applicable	Not Available	Not Available	Not Available	0	Not Available	953	62	Not Available
TCGA-DG-A2KM	FEMALE	169	1946	Not Available		Cervical Squamous Cell Carcinoma	Cervical	Alive	T1b1	N1	M0	Stage IB1	G2	0	1946			TUMOR FREE		46	Not Available	Not Applicable	TCGA-DG-A2KM	E87FADBE-C58C-41D1-B413-8CF6CE70CE94	Former User	ABSENT	Not Available	Not Applicable	Not Available	10	-16808	Not Applicable	Not Available	Not Available	Not Available	0	Not Available	1218	Not Available	Not Available		Bladder Absent;Extra-Pelvic Metastatic Disease Absent;Parametrium Absent;Paraaortic Nodes Absent;Pelvic Nodes Absent;Supraclavicular Absent			TCGA-DG-A2KM-D49780	EA657419-8880-44EF-9936-5476962614BA	Not Available	10	155
TCGA-C5-A2LT	FEMALE	163	2226	59	22.2063	Cervical Squamous Cell Carcinoma	Cervical	Alive	T1b	N0	M0	Stage IB	G3	0	2226			TUMOR FREE		38	20	Not Applicable	TCGA-C5-A2LT	FB66B7F5-22CA-4D4D-97C2-30E6EDFFF781	Current User	ABSENT	Not Available	margins free of tumor	Other Location, specify	24	-13966	Not Applicable	Not Available	Not Available	Not Available	0	Not Available	2226	14	Not Available					TCGA-C5-A2LT-D21298	D103CCB4-91ED-4A27-861D-D1AED78A279E	Not Available	8	152
TCGA-VS-A9V1	FEMALE	155	157	45	18.7305	Mucinous Adenocarcinoma of Endocervical Type	Cervical	Dead	T3b	NX	MX	Stage IVB	G2	1	58		Distant Metastasis	WITH TUMOR		46	24	Not Applicable	TCGA-VS-A9V1	A6A07BC7-AB1B-429D-81ED-D7A890C88E51	Never Used	Not Available	Not Available	Not Applicable	Not Available	5	-17001	157	Not Available	Not Available	Not Available	0	Not Available	Not Available	Not Available	Not Available					TCGA-VS-A9V1-D64593	70591F56-179A-43E5-BC9C-587884B78384	Not Available	5	49
TCGA-C5-A1MQ	FEMALE	175	1031	116	37.8776	Cervical Squamous Cell Carcinoma	Cervical	Alive	T2b	N0	M0	Stage IIA	G2	0	1031			TUMOR FREE		35	Not Available	Not Applicable	TCGA-C5-A1MQ	eb59cf69-1997-41b9-bf69-69ad7da292a1	Not Available	ABSENT	Not Available	Not Applicable	Microscopic parametrial involvement	21	-12836	Not Applicable	Not Available	Not Available	23	0	Not Available	17	Not Available	Not Available					TCGA-C5-A1MQ-D31341	AA6B4B82-7328-43D8-809B-164E794CE799	Not Available	30	151
TCGA-EK-A2R8	FEMALE	170	44	75	25.9516	Cervical Squamous Cell Carcinoma	Cervical	Alive	T1b2	N1	MX	Stage IB2	G3	0	44			WITH TUMOR		48	Not Available	Not Applicable	TCGA-EK-A2R8	D4510801-8CE4-4F10-8B31-25C0A39B5135	Not Available	ABSENT	Not Available	Not Applicable	Not Available	2	-17692	Not Applicable	Not Available	Not Available	Not Available	0	Not Available	40	37	Not Available
TCGA-EA-A5FO	FEMALE	162	815	58	22.1003	Cervical Squamous Cell Carcinoma	Cervical	Alive	T1b1	N0	M0	Stage IB1	G2	0	815			TUMOR FREE		59	Not Available	Not Applicable	TCGA-EA-A5FO	ED17685C-B706-41E4-8A76-11CB0E6700CD	Unknown	ABSENT	Not Available	Not Applicable	Not Available	22	-21561	Not Applicable	Not Available	Not Available	Not Available	0	Not Available	45	45	Not Available
TCGA-JW-AAVH	FEMALE	155	552	165	68.6785	Cervical Squamous Cell Carcinoma	Cervical	Alive	T1b1	N0	M0	Stage IB1	G2	0	552			TUMOR FREE		46	16	Not Applicable	TCGA-JW-AAVH	1C0B5C18-8760-4483-A88C-1D1D89F61998	Unknown	Not Available	Not Available	Not Applicable	Not Available	3	-16894	Not Applicable	21	Not Available	Not Available	0	Not Available	204	170	Not Available		Bladder Present;Extra-Pelvic Metastatic Disease Absent;Pelvic Nodes Present
TCGA-VS-A959	FEMALE	145	1561	47	22.3543	Cervical Squamous Cell Carcinoma	Cervical	Alive	T2b	NX	MX	Stage IIB	G3	0	1561			TUMOR FREE		76	Not Available	Not Applicable	TCGA-VS-A959	F2BEA37E-0D19-49E1-91A0-A4DE4DFA2D35	Never Used	Not Available	Not Available	Not Applicable	Not Available	27	-27897	Not Applicable	Not Available	Not Available	Not Available	0	Not Available	1197	Not Available	Not Available
TCGA-MY-A913	FEMALE	163	524	76	28.6048	Cervical Squamous Cell Carcinoma	Cervical	Alive	Tis	N0	M1	Stage IIA	G3	0	524			TUMOR FREE		28	Not Available	Not Applicable	TCGA-MY-A913	C9F519B6-73F1-4737-83CB-F5EF208592CD	Unknown	Not Available	Not Available	Not Applicable	Not Available	23	-10379	Not Applicable	166	21	-7	0	Not Available	167	152	Not Available		Bladder Absent;Extra-Pelvic Metastatic Disease Absent;Parametrium Absent;Paraaortic Nodes Absent;Pelvic Nodes Absent;Supraclavicular Absent		Bladder Absent;Extra-Pelvic Metastatic Disease Absent;Parametrium Absent;Paraaortic Nodes Absent;Pelvic Nodes Absent;Supraclavicular Absent	TCGA-MY-A913-D59733	6CFF5264-76FD-43DC-87CB-9C01433D42E3	Not Available	20	79
TCGA-ZJ-AB0H	FEMALE	Not Available	0	Not Available		Cervical Squamous Cell Carcinoma	Cervical	Alive	T3b	N1	M0	Stage IIIB	Not Available	0	0			Unknown		48	Not Available	Not Applicable	TCGA-ZJ-AB0H	F0DAF315-8909-4CDA-886D-A2770B08DB94	Unknown	Not Available	Not Available	Not Applicable	Not Available	19	-17869	Not Applicable	Not Available	Not Available	Not Available	0	Not Available	0	Not Available	Not Available
TCGA-2W-A8YY	FEMALE	160	533	42	16.4062	Adenosquamous	Cervical	Alive	T2a2	N0	M0	Stage IB2	G3	0	533			TUMOR FREE		51	Not Available	Not Applicable	TCGA-2W-A8YY	5AEAC31A-176A-4F93-A376-A93A670821BB	Former User	PRESENT	Not Available	Not Applicable	Macroscopic parametrial involvement	15	-18886	Not Applicable	Not Available	Not Available	145	0	Not Available	148	148	Not Available					TCGA-2W-A8YY-D58309	14ACEFE0-DDC0-4A31-B354-D0A304A6C773	Not Available	15	99
TCGA-EK-A2RJ	FEMALE	162	53	85	32.3884	Cervical Squamous Cell Carcinoma	Cervical	Alive	T1b2	N0	MX	Stage IB2	G3	0	53			TUMOR FREE		51	Not Available	Not Applicable	TCGA-EK-A2RJ	CCD569E9-DCBE-4280-8C21-6BFE4CE60D7A	Not Available	Not Available	Not Available	Not Applicable	Not Available	2	-18664	Not Applicable	Not Available	Not Available	Not Available	0	Not Available	53	33	Not Available
TCGA-ZJ-A8QO	FEMALE	Not Available	0	Not Available		Cervical Squamous Cell Carcinoma	Cervical	Alive					Not Available	0	0			Unknown		73	Not Available	Not Applicable	TCGA-ZJ-A8QO	EB3BA1FB-8254-4C02-A982-507F075CBAC1	Unknown	Not Available	Not Available	Not Applicable	Not Available	19	-26723	Not Applicable	Not Available	Not Available	Not Available	0	Not Available	0	Not Available	Not Available
TCGA-C5-A8XI	FEMALE	Not Available	254	Not Available		Cervical Squamous Cell Carcinoma	Cervical	Alive	T1b2	N0	MX	Stage IB2	G3	0	254			TUMOR FREE		69	29	Not Applicable	TCGA-C5-A8XI	959FE574-054A-4FEF-9CBE-A801A9A355DE	Not Available	Not Available	Not Available	margins free of tumor	Other Location, specify	17	-25220	Not Applicable	Not Available	Not Available	Not Available	0	Not Available	254	Not Available	Not Available					TCGA-C5-A8XI-D58650	BCB7C41F-67F7-4B56-8448-39B7D7C61C9B	Not Available	17	Not Available
TCGA-DS-A3LQ	FEMALE	163	699	72	27.0993	Cervical Squamous Cell Carcinoma	Cervical	Alive	T3b	N1	M0	Stage IIIB	G3	0	699			Not Available		46	Not Available	Not Applicable	TCGA-DS-A3LQ	63BFFDB1-BC08-4175-8BE7-D7A056D19816	Former User	Not Available	Not Available	None	Other Location, specify	23	-16861	Not Applicable	Not Available	Not Available	Not Available	0	Not Available	183	2	Not Available					TCGA-DS-A3LQ-D31100	64E076D2-EC46-4033-B991-A5716A6D19A7	Not Available	23	89
TCGA-Q1-A5R3	FEMALE	162	485	50	19.052	Cervical Squamous Cell Carcinoma	Cervical	Alive	TX	NX	MX		G2	0	485			TUMOR FREE		56	Not Available	Not Applicable	TCGA-Q1-A5R3	73AA428A-4288-45F8-8A53-CEC173DCC61F	Former User	Unknown	Not Available	Not Applicable	Not Available	26	-20574	Not Applicable	Not Available	Not Available	Not Available	0	Not Available	178	178	Not Available					TCGA-Q1-A5R3-D48282	C5C29ED4-F72E-4232-ACC3-915430D476E6	N/A	11	56
TCGA-MA-AA43	FEMALE	152	346	72	31.1634	Cervical Squamous Cell Carcinoma	Cervical	Alive	T3b	NX	MX	Stage IIIB	G3	0	346			TUMOR FREE		48	16	Not Applicable	TCGA-MA-AA43	ED74703A-6838-4F4E-9524-D6FB7B208687	Never Used	Not Available	Not Available	Not Applicable	Not Available	22	-17658	Not Applicable	Not Available	70	66	0	Not Available	227	39	Not Available				Bladder Absent;Extra-Pelvic Metastatic Disease Absent;Parametrium Absent;Paraaortic Nodes Absent;Pelvic Nodes Present;Supraclavicular Absent
TCGA-EA-A3Y4	FEMALE	167	1122	99	35.4979	Cervical Squamous Cell Carcinoma	Cervical	Alive	T1b	N0	M0	Stage IB	G3	0	1122			TUMOR FREE		40	Not Available	Not Applicable	TCGA-EA-A3Y4	3AC62513-B5F4-4063-AABD-DAD08A1F56FB	Not Available	ABSENT	Not Available	Not Applicable	Not Available	24	-14706	Not Applicable	Not Available	Not Available	Not Available	0	Not Available	35	35	Not Available
TCGA-EA-A5ZF	FEMALE	151	828	51	22.3674	Cervical Squamous Cell Carcinoma	Cervical	Alive	T1b1	NX	M0	Stage IB1	G2	1	440	Cervix	Locoregional Recurrence	TUMOR FREE		56	Not Available	Not Applicable	TCGA-EA-A5ZF	0C6BB7DC-45A6-4190-A7C9-B080D49FD58A	Former User	ABSENT	Not Available	Not Applicable	Unknown	24	-20506	Not Applicable	Not Available	Not Available	Not Available	0	Not Available	26	Not Available	Not Available
TCGA-C5-A2LS	FEMALE	173	1345	92	30.7394	Endocervical Adenocarcinoma of the Usual Type	Cervical	Alive	T1b2	N0	M0	Stage IB2	G1	0	1345			TUMOR FREE		37	17	Not Applicable	TCGA-C5-A2LS	185E1520-92EE-4AF5-AF15-FBEEFB352C99	Not Available	Not Available	Not Available	margins free of tumor	Other Location, specify	3	-13857	Not Applicable	Not Available	Not Available	Not Available	0	Not Available	1345	Not Available	Not Available
TCGA-HG-A9SC	FEMALE	173	504	68	22.7204	Adenosquamous	Cervical	Alive	T2b	N0	MX	Stage IIB	G3	0	504			TUMOR FREE		49	Not Available	Not Applicable	TCGA-HG-A9SC	CF87812F-6DB6-4592-9842-C62B3E4FF03F	Former User	Unknown	Not Available	Not Applicable	Not Available	19	-17963	Not Applicable	3	Not Available	Not Available	0	Not Available	217	21	Not Available					TCGA-HG-A9SC-D60991	64D96D07-DE09-491B-8668-3102380DA868	Not Available	19	106
TCGA-LP-A4AX	FEMALE	Not Available	380	Not Available		Cervical Squamous Cell Carcinoma	Cervical	Alive	T1b1	N0	M0	Stage IB1	G3	0	380			TUMOR FREE		45	Not Available	Not Applicable	TCGA-LP-A4AX	3223FEC6-1D35-419A-8EE9-7C5885B8BE1E	Unknown	Not Available	Not Available	Not Applicable	Unknown	12	-16544	Not Applicable	Not Available	Not Available	Not Available	0	Not Available	2	Not Available	Not Available
TCGA-VS-A9UL	FEMALE	149	442	56	25.2241	Cervical Squamous Cell Carcinoma	Cervical	Dead	T3b	NX	MX	Stage IIIB	G3	1	336		Distant Metastasis	WITH TUMOR		79	Not Available	Not Applicable	TCGA-VS-A9UL	7ABACA8F-962E-4F9D-B63F-26C131BF5961	Never Used	Not Available	Not Available	Not Applicable	Not Available	5	-29033	442	Not Available	Not Available	Not Available	0	Not Available	Not Available	-1	Not Available
TCGA-C5-A3HD	FEMALE	170	1582	83	28.7197	Cervical Squamous Cell Carcinoma	Cervical	Alive				Stage IIB	G2	0	1582			TUMOR FREE		51	16	Not Applicable	TCGA-C5-A3HD	12427B02-6E3F-461C-B271-6AB230F628E7	Former User	Not Available	Not Available	Not Applicable	Not Available	17	-18690	Not Applicable	Not Available	Not Available	3	0	Not Available	1582	0	Not Available					TCGA-C5-A3HD-D30835	C267EDF4-0C73-4C1D-96C6-355B2287ADA9	Not Available	17	Not Available
TCGA-UC-A7PD	FEMALE	Not Available	355	Not Available		Cervical Squamous Cell Carcinoma	Cervical	Dead	T1b	N0	M0	Stage IB	G2	1	202		Locoregional Recurrence	WITH TUMOR		21	13	Not Applicable	TCGA-UC-A7PD	0F18EF74-019B-478D-AECD-60CC715BFDB7	Former User	Unknown	Not Available	perineural space invasion	Other Location, specify	4	-7855	355	Not Available	Not Available	Not Available	0	Not Available	Not Available	-1	Not Available
TCGA-C5-A7UC	FEMALE	Not Available	523	Not Available		Cervical Squamous Cell Carcinoma	Cervical	Dead	T1b	N0	M0	Stage IB	G3	0	523			TUMOR FREE		48	Not Available	Not Applicable	TCGA-C5-A7UC	5C326E9B-85E2-4673-9033-C11827467E1A	Not Available	Not Available	Not Available	margins free of tumor	Other Location, specify	3	-17765	523	Not Available	Not Available	Not Available	0	Not Available	Not Available	Not Available	Not Available
TCGA-ZX-AA5X	FEMALE	157	119	56	22.719	Cervical Squamous Cell Carcinoma	Cervical	Alive	TX	NX	MX	Stage IIIB	G2	1				WITH TUMOR		64	Not Available	Not Applicable	TCGA-ZX-AA5X	4756ACC0-4E96-44D4-B359-04D64DC7EB84	Unknown	Not Available	Bilateral pelvic wall involvement on imaging	Not Applicable	Not Available	24	-23440	Not Applicable	-2	Not Available	52	0	Not Available	119	7	Not Available		Bladder Present;Unknown;Unknown;Unknown;Unknown;Unknown
TCGA-DS-A7WH	FEMALE	168	533	50	17.7154	Mucinous Adenocarcinoma of Endocervical Type	Cervical	Alive	T1b1	N0	MX	Stage IB1	G2	0	533			TUMOR FREE		34	Not Available	Not Applicable	TCGA-DS-A7WH	DADCF6D5-03EB-4090-BCC3-B9E9DC3C7E08	Former User	Not Available	Not Available	Not Applicable	Not Available	23	-12644	Not Applicable	Not Available	Not Available	5	0	Not Available	223	Not Available	Not Available					TCGA-DS-A7WH-D54774	77253106-F449-4E19-800E-3EB594A38AD4	Not Available	23	112
TCGA-EK-A2RM	FEMALE	167	50	105	37.6493	Cervical Squamous Cell Carcinoma	Cervical	Alive				Stage IB	G3	1				WITH TUMOR		40	Not Available	Not Applicable	TCGA-EK-A2RM	C13215D9-26A8-4C8B-B4FE-5DA6AA3222AF	Not Available	Not Available	Not Available	Not Applicable	Not Available	1	-14842	Not Applicable	Not Available	Not Available	Not Available	0	Not Available	50	0	Not Available
TCGA-C5-A7XC	FEMALE	Not Available	1551	53		Cervical Squamous Cell Carcinoma	Cervical	Alive	T1b	N0	M0	Stage IB1	G2	0	1551			TUMOR FREE		26	Not Available	Not Applicable	TCGA-C5-A7XC	DEDFD5FB-3C72-40F9-A7EF-52C2176BF662	Not Available	Not Available	Not Available	margins free of tumor	Other Location, specify	7	-9776	Not Applicable	Not Available	Not Available	Not Available	0	Not Available	1551	Not Available	Not Available
TCGA-C5-A8XK	FEMALE	Not Available	3039	Not Available		Cervical Squamous Cell Carcinoma	Cervical	Alive					G3	0	3039			TUMOR FREE		30	Not Available	Not Applicable	TCGA-C5-A8XK	8AC819B3-4227-4EAE-BE03-8760B197DF9A	Not Available	Not Available	Not Available	Not Applicable	Not Available	1	-11268	Not Applicable	Not Available	Not Available	Not Available	0	Not Available	3039	Not Available	Not Available					TCGA-C5-A8XK-D58139	3690C830-6E5E-4FA9-8B13-65AB49B74002	Not Available	1	Not Available
TCGA-IR-A3LL	FEMALE	157	1106	92	37.324	Cervical Squamous Cell Carcinoma	Cervical	Alive	T1b1	N0	M0	Stage IB1	G2	0	1106			TUMOR FREE		60	Not Available	Not Applicable	TCGA-IR-A3LL	7C4AB1CA-4BDD-4EF7-9A42-F6C0C7136D26	Not Available	ABSENT	Not Available	Not Applicable	Not Available	13	-22123	Not Applicable	Not Available	Not Available	Not Available	0	Not Available	720	Not Available	Not Available					TCGA-IR-A3LL-D38340	04E0C6F4-594D-4A80-A45A-F15B5D290A01	Not Available	14	80
TCGA-EK-A2IR	FEMALE	160	3442	61	23.8281	Cervical Squamous Cell Carcinoma	Cervical	Alive	T1b	N0	MX	Stage IB2	G3	0	3442			TUMOR FREE		48	Not Available	Not Applicable	TCGA-EK-A2IR	A04CB81E-53BD-4686-9626-52EE87E3E261	Not Available	ABSENT	Not Available	Not Applicable	Not Available	8	-17581	Not Applicable	Not Available	Not Available	4	0	Not Available	2679	-7	Not Available
TCGA-VS-A9UB	FEMALE	166	911	79	28.6689	Cervical Squamous Cell Carcinoma	Cervical	Alive	T2b	N0	MX	Stage IIB	G3	0	911			TUMOR FREE		54	Not Available	Not Applicable	TCGA-VS-A9UB	CA242B4C-B879-4E13-A1E7-84C984067189	Never Used	Not Available	Not Available	Not Applicable	Not Available	1	-19737	Not Applicable	Not Available	Not Available	Not Available	0	Not Available	562	0	Not Available					TCGA-VS-A9UB-D65878	107F4992-511B-4946-8096-D16382E92606	Not Available	1	100
TCGA-C5-A1M9	FEMALE	155	1065	49	20.3954	Endocervical Type of Adenocarcinoma	Cervical	Dead	T3b	N1	M0	Stage IB1	G3	1	555	Lung	Distant Metastasis	WITH TUMOR		46	Not Available	Not Applicable	TCGA-C5-A1M9	a3be445a-a592-4073-815b-47ae41f9c4a0	Former User	ABSENT	Not Available	margins free of tumor	Other Location, specify	19	-17020	1065	5	Not Available	5	0	Not Available	Not Available	Not Available	Not Available		Extra-Pelvic Metastatic Disease Present;Paraaortic Nodes Present;Pelvic Nodes Present;Supraclavicular Absent			TCGA-C5-A1M9-D29231;TCGA-C5-A1M9-D29255	C5BFBED2-5160-4123-87EF-9FC20F4C7FC1;50E2A9E4-9469-4FB3-83A2-6C425255B6EB	Not Available;Not Available	12;13	116;Not Available
TCGA-C5-A1M5	FEMALE	Not Available	2052	70		Cervical Squamous Cell Carcinoma	Cervical	Dead	T1b	N0	M0	Stage IB	G2	1	693	Other, specify	Distant Metastasis	WITH TUMOR		53	Not Available	Not Applicable	TCGA-C5-A1M5	0fec73a1-8d3a-495b-8008-c52f190f4270	Not Available	ABSENT	Not Available	margins free of tumor	Other Location, specify	19	-19672	2052	Not Available	Not Available	Not Available	0	Not Available	Not Available	Not Available	Not Available
TCGA-VS-A9UA	FEMALE	134	867	88	49.0087	Cervical Squamous Cell Carcinoma	Cervical	Alive	T3	NX	MX	Stage IIIA	G3	0	867			TUMOR FREE		60	Not Available	Not Applicable	TCGA-VS-A9UA	60117B70-36C0-41BB-A9FC-85DB8FA10102	Never Used	Not Available	Not Available	Not Applicable	Not Available	11	-22221	Not Applicable	Not Available	Not Available	Not Available	0	Not Available	526	0	Not Available					TCGA-VS-A9UA-D63477	B1D0877D-E150-40BF-AD5F-ACB4BBEAC36D	Not Available	11	162
TCGA-VS-A9V0	FEMALE	158	573	76	30.4438	Mucinous Adenocarcinoma of Endocervical Type	Cervical	Alive	T1b	NX	MX	Stage IB	G3	1	475	Other, specify	Distant Metastasis	WITH TUMOR		58	27	Not Applicable	TCGA-VS-A9V0	A5885835-9473-455A-BAC0-6FA43FA8A866	Never Used	Not Available	Not Available	Not Applicable	Not Available	1	-21215	Not Applicable	Not Available	Not Available	Not Available	0	Not Available	529	Not Available	Not Available					TCGA-VS-A9V0-D65886	F3AA1D6F-478C-4EAB-A251-42884E286649	Not Available	1	166
TCGA-FU-A770	FEMALE	175	34	67	21.8776	Endocervical Adenocarcinoma of the Usual Type	Cervical	Alive	T2a2	N1	MX	Stage IIIB	G2	0	34			TUMOR FREE		33	16	Not Applicable	TCGA-FU-A770	128FD280-9A04-4038-9269-9A945B9A4DC9	Former User	ABSENT	Tumor extends 1.0cm into 1.3 cm thick cervical/lower uterine segment wall	Not Applicable	Not Available	26	-12248	Not Applicable	Not Available	Not Available	0	0	Not Available	34	30	Not Available
TCGA-EK-A2R7	FEMALE	165	27	75	27.5482	Cervical Squamous Cell Carcinoma	Cervical	Alive	T1b1	N1	M0	Stage IB	G3	0	27			TUMOR FREE		45	Not Available	Not Applicable	TCGA-EK-A2R7	D7A75BF5-5189-4978-99D9-FCEF91C9FBD2	Current User	Not Available	Not Available	Not Applicable	Not Available	2	-16487	Not Applicable	Not Available	Not Available	Not Available	0	Not Available	27	16	Not Available
TCGA-VS-A8EH	FEMALE	157	986	44	17.8506	Cervical Squamous Cell Carcinoma	Cervical	Alive	T3b	NX	M0	Stage IIIB	G2	0	986			TUMOR FREE		56	39	Not Applicable	TCGA-VS-A8EH	05026179-B1DA-411E-A286-89727B1AE380	Never Used	Not Available	Not Available	Not Applicable	Not Available	22	-20728	Not Applicable	Not Available	Not Available	Not Available	0	Not Available	615	41	Not Available					TCGA-VS-A8EH-D62772	6AA03F28-F6A9-444D-86FF-1E86AA069F1A	Not Available	24	88
TCGA-DS-A0VL	FEMALE	170	1692	86	29.7578	Cervical Squamous Cell Carcinoma	Cervical	Dead	T1b1	N0	M0	Stage IB	G2	0	1692			TUMOR FREE		25	Not Available	Not Applicable	TCGA-DS-A0VL	dfd30f94-19e3-4838-95df-14a3763419af	Never Used	ABSENT	Not Available	Posterior radical soft tissue	Other Location, specify	7	-9186	Not Applicable	Not Available	Not Available	Not Available	0	Not Available	81	0	Not Available
TCGA-VS-A9UO	FEMALE	159	1456	40	15.8222	Mucinous Adenocarcinoma of Endocervical Type	Cervical	Alive	T2b	N0	MX	Stage IIB	G2	0	1456			TUMOR FREE		43	Not Available	Not Applicable	TCGA-VS-A9UO	4DA121DA-9193-4AC5-8206-03CB1F7C2C14	Never Used	Not Available	Not Available	Not Applicable	Not Available	11	-15813	Not Applicable	Not Available	Not Available	Not Available	0	Not Available	1080	0	Not Available					TCGA-VS-A9UO-D63484	7DF378B9-E2A9-41C7-BCF8-FFE5A356565D	Not Available	11	69
TCGA-C5-A1MK	FEMALE	155	74	63	26.2227	Cervical Squamous Cell Carcinoma	Cervical	Dead				Stage IIIB	G3	1				WITH TUMOR		79	Not Available	Not Applicable	TCGA-C5-A1MK	b726f18b-b996-4978-9f27-b3a540e06270	Not Available	Not Available	Not Available	Not Applicable	Not Available	21	-28939	74	Not Available	Not Available	Not Available	0	Not Available	Not Available	Not Available	Not Available					TCGA-C5-A1MK-D30184	2B5D6306-B757-4481-AAFD-9C8DBDBBECFB	Not Available	4	74
TCGA-MA-AA42	FEMALE	140	259	63	32.1429	Cervical Squamous Cell Carcinoma	Cervical	Alive	T2b	N0	M0	Stage IIB	G3	0	259			TUMOR FREE		75	Not Available	Not Applicable	TCGA-MA-AA42	DA5FCB99-16B4-4F9E-8602-D6A6192875EF	Unknown	Not Available	Not Available	Not Applicable	Not Available	22	-27460	Not Applicable	Not Available	14	19	0	Not Available	168	0	Not Available				Bladder Absent;Extra-Pelvic Metastatic Disease Absent;Parametrium Absent;Paraaortic Nodes Absent;Pelvic Nodes Absent;Supraclavicular Absent
TCGA-C5-A1BM	FEMALE	171	2520	56	19.1512	Cervical Squamous Cell Carcinoma	Cervical	Dead	T2	N1	MX	Stage IB	G2	0	2520			TUMOR FREE		78	Not Available	Not Applicable	TCGA-C5-A1BM	7fb8e7be-4118-41f8-b785-5cbb0afdb8b7	Not Available	PRESENT	Not Available	Not Applicable	Positive vaginal margin	21	-28815	2520	22	Not Available	102	0	Not Available	Not Available	Not Available	Not Available
TCGA-HM-A3JK	FEMALE	165	632	94	34.5271	Cervical Squamous Cell Carcinoma	Cervical	Alive	T2b	N1	MX	Stage IIA2	G3	0	632			TUMOR FREE		64	Not Available	Not Applicable	TCGA-HM-A3JK	7C4CD55F-750E-4941-A9F3-0632A75D6531	Never Used	Not Available	carcinoma involves all sections of the cervix with direct extension into the myometrial wall, parametrial tissues and upper vagina.	Not Applicable	Not Available	17	-23618	Not Applicable	17	Not Available	17	0	Not Available	168	21	Not Available		Bladder Absent;Extra-Pelvic Metastatic Disease Absent;Paraaortic Nodes Absent;Pelvic Nodes Absent;Supraclavicular Absent			TCGA-HM-A3JK-D21788	8143DAE6-E257-403E-BB9D-38884E600FF7	Not Available	20	107
TCGA-VS-A9U5	FEMALE	162	1535	74	28.1969	Cervical Squamous Cell Carcinoma	Cervical	Alive	T2b	NX	MX	Stage IIB	G3	0	1535			TUMOR FREE		57	Not Available	Not Applicable	TCGA-VS-A9U5	939ABCA1-8BD0-4271-9A9B-666764EEB3B6	Never Used	Not Available	Not Available	Not Applicable	Not Available	11	-21149	Not Applicable	Not Available	Not Available	Not Available	0	Not Available	1185	-3	Not Available					TCGA-VS-A9U5-D63439	EF658883-3A46-4E6C-8256-6A45287BD55E	Not Available	11	71
TCGA-JX-A5QV	FEMALE	165	636	61	22.4059	Cervical Squamous Cell Carcinoma	Cervical	Alive	T1b1	N0	M0	Stage IB1	G3	0	636			TUMOR FREE		37	Not Available	Not Applicable	TCGA-JX-A5QV	ACF5CBF3-09CA-4F4D-A44E-1792613190FC	Never Used	ABSENT	Not Available	Not Applicable	Unknown	11	-13667	Not Applicable	Not Available	Not Available	8	0	Not Available	243	7	Not Available
TCGA-C5-A1BK	FEMALE	151	5385	82	35.9633	Cervical Squamous Cell Carcinoma	Cervical	Alive	T1b	N0	MX	Stage IB	G2	0	5385			TUMOR FREE		36	Not Available	Not Applicable	TCGA-C5-A1BK	7df6c297-f2d6-43ef-973b-1f95676b0cc4	Not Available	ABSENT	Not Available	margins free of tumor	Other Location, specify	23	-13297	Not Applicable	Not Available	Not Available	Not Available	0	Not Available	5385	Not Available	Not Available
TCGA-Q1-A73R	FEMALE	155	567	95	39.5421	Endocervical Type of Adenocarcinoma	Cervical	Alive	TX	NX	MX	Stage I	GX	0	567			Unknown		45	Not Available	Not Applicable	TCGA-Q1-A73R	D9B0AC5A-811D-4305-BB1C-A965BD389CE4	Unknown	Not Available	Not Available	Not Applicable	Not Available	31	-16701	Not Applicable	Not Available	Not Available	Not Available	0	Not Available	190	190	Not Available
TCGA-C5-A7X5	FEMALE	163	414	59	22.2063	Cervical Squamous Cell Carcinoma	Cervical	Dead				Stage IVB	G3	0	414			WITH TUMOR		72	Not Available	Not Applicable	TCGA-C5-A7X5	AED93A3A-7DCB-4BA9-84C0-BC735CBD545F	Not Available	Not Available	Not Available	Not Applicable	Not Available	3	-26542	414	Not Available	Not Available	Not Available	0	Not Available	Not Available	Not Available	Not Available					TCGA-C5-A7X5-D56988;TCGA-C5-A7X5-D56989	03521B1B-810A-4BE9-9B34-207EE2D821DC;07EDF1F2-521E-473D-B227-ED8038C74D39	Not Available;Not Available	27;27	202;202
TCGA-ZJ-AAX4	FEMALE	170	21	77	26.6436	Cervical Squamous Cell Carcinoma	Cervical	Alive	T2	N0	M0	Stage II	G3	0	21			Unknown		85	23	Not Applicable	TCGA-ZJ-AAX4	13D72130-604C-4D79-95CC-53C2E25D91B0	Never Used	Not Available	Not Available	Not Applicable	Positive vaginal margin	19	-31258	Not Applicable	Not Available	Not Available	Not Available	0	Not Available	21	Not Available	Not Available
TCGA-C5-A7X8	FEMALE	170	83	74	25.6055	Mucinous Adenocarcinoma of Endocervical Type	Cervical	Alive	T2a	N1	M0	Stage IB1	G2	0	83			TUMOR FREE		35	25	Not Applicable	TCGA-C5-A7X8	57902B91-BE42-441D-8807-A5EA9C21B214	Not Available	Not Available	Not Available	margins free of tumor	Other Location, specify	3	-12977	Not Applicable	Not Available	Not Available	Not Available	0	Not Available	83	Not Available	Not Available					TCGA-C5-A7X8-D57044	5D6C5633-842A-4C8C-9FC6-7C9489484FEA	Not Available	28	Not Available
TCGA-VS-A94Z	FEMALE	162	1015	96	36.5798	Cervical Squamous Cell Carcinoma	Cervical	Alive	T2b	NX	MX	Stage IIB	G2	0	1015			TUMOR FREE		38	27	Not Applicable	TCGA-VS-A94Z	69BABA9F-19C2-4947-95DC-0DD3412929BA	Never Used	Not Available	Not Available	Not Applicable	Not Available	21	-14046	Not Applicable	Not Available	Not Available	Not Available	0	Not Available	707	39	Not Available					TCGA-VS-A94Z-D62793	138D8801-6CD9-43F9-B8D3-1FB6FB9BF29A	Not Available	24	80
TCGA-MA-AA3X	FEMALE	170	617	73	25.2595	Cervical Squamous Cell Carcinoma	Cervical	Alive	T3b	NX	MX	Stage IIIB	G2	0	617			TUMOR FREE		50	12	Not Applicable	TCGA-MA-AA3X	ADB7C5C8-4AFD-40DC-89F1-571FBD88E4F9	Unknown	Not Available	Not Available	Not Applicable	Not Available	15	-18412	Not Applicable	83	1	77	0	Not Available	617	0	Not Available		Bladder Absent;Extra-Pelvic Metastatic Disease Absent;Parametrium Absent;Paraaortic Nodes Absent;Pelvic Nodes Absent;Supraclavicular Absent		Unknown;Extra-Pelvic Metastatic Disease Absent;Parametrium Absent;Paraaortic Nodes Absent;Pelvic Nodes Absent;Supraclavicular Absent	TCGA-MA-AA3X-D64892	10F27E3D-3267-4B36-A08A-A46F8A6D8FD0	Not Available	15	140
TCGA-EX-A3L1	FEMALE	160	463	57	22.2656	Cervical Squamous Cell Carcinoma	Cervical	Alive	T2a1	N0	M0	Stage IIA1	G3	0	463			TUMOR FREE		32	Not Available	Not Applicable	TCGA-EX-A3L1	F5D90810-8C4B-4CED-9360-383E42CB54B3	Current User	ABSENT	Not Available	Not Applicable	Not Available	19	-11943	Not Applicable	Not Available	Not Available	Not Available	0	Not Available	211	Not Available	Not Available					TCGA-EX-A3L1-D38133	D5445E7B-B1F0-466E-9421-73072DDC7669	Not Available	11	131
TCGA-C5-A1MN	FEMALE	165	1245	64	23.5078	Cervical Squamous Cell Carcinoma	Cervical	Dead				Stage IIIB	G2	0	1245			TUMOR FREE		42	Not Available	Not Applicable	TCGA-C5-A1MN	287ce10e-31c8-4b10-9858-6e45451dfbe4	Former User	Not Available	Not Available	Not Applicable	Not Available	21	-15499	1245	Not Available	Not Available	1	0	Not Available	Not Available	875	Not Available					TCGA-C5-A1MN-D30193	7B3A715D-196B-44E7-9A3B-BD3C3DA17A09	Not Available	4	Not Available
TCGA-Q1-A6DV	FEMALE	152	491	60	25.9695	Mucinous Adenocarcinoma of Endocervical Type	Cervical	Alive	T1b1	N0	M0	Stage IB1	G2	0	491			Unknown		36	Not Available	Not Applicable	TCGA-Q1-A6DV	C80F777E-D150-40F3-9FA9-02EF9A6D7692	Current User	ABSENT	Not Available	Not Applicable	Unknown	20	-13166	Not Applicable	Not Available	Not Available	Not Available	0	Not Available	113	-12	Not Available
TCGA-VS-A8EJ	FEMALE	167	607	113	40.5178	Cervical Squamous Cell Carcinoma	Cervical	Dead	T2b	NX	M1	Stage IIB	G3	0	607			WITH TUMOR		60	Not Available	Not Applicable	TCGA-VS-A8EJ	2E08A89E-4035-4782-B54F-F98EEF5DB80D	Unknown	Not Available	Not Available	Not Applicable	Not Available	22	-22000	607	Not Available	Not Available	Not Available	0	Not Available	Not Available	0	Not Available					TCGA-VS-A8EJ-D62775;TCGA-VS-A8EJ-D62776;TCGA-VS-A8EJ-D62777	D2AD658E-3F2A-48BD-82EE-431A683B66BE;908D2796-3195-4448-8BD1-72E85523306F;D2D50CB6-E465-45B9-A255-2178CEC9FE12	Not Available;Not Available;Not Available	24;24;24	155;322;322
TCGA-EA-A5O9	FEMALE	160	788	99	38.6719	Cervical Squamous Cell Carcinoma	Cervical	Alive	T1b2	N0	M0	Stage IB2	G2	0	788			TUMOR FREE		39	Not Available	Not Applicable	TCGA-EA-A5O9	1636242C-12DA-412E-A362-914A20ADD708	Never Used	ABSENT	Not Available	Not Applicable	Not Available	22	-14472	Not Applicable	Not Available	Not Available	Not Available	0	Not Available	27	26	Not Available
TCGA-ZJ-AAXI	FEMALE	Not Available	0	Not Available		Cervical Squamous Cell Carcinoma	Cervical	Alive	T2b	NX	M0	Stage IIB	G2	0	0			Unknown		67	Not Available	Not Applicable	TCGA-ZJ-AAXI	40A86987-E77F-4977-92B1-8217796E1938	Unknown	Not Available	Not Available	Not Applicable	Not Available	31	-24497	Not Applicable	Not Available	Not Available	Not Available	0	Not Available	0	Not Available	Not Available
TCGA-VS-A9V3	FEMALE	164	540	60	22.3081	Cervical Squamous Cell Carcinoma	Cervical	Alive	T4	NX	MX	Stage IVB	G3	1	456	Other, specify	Distant Metastasis	TUMOR FREE		62	Not Available	Not Applicable	TCGA-VS-A9V3	1CB1D2CA-DFA6-4C42-9DA9-C711DC5AAB5D	Former User	Not Available	Not Available	Not Applicable	Not Available	11	-22990	Not Applicable	Not Available	Not Available	Not Available	0	Not Available	253	-2	Not Available					TCGA-VS-A9V3-D63454	BA99CD4B-A6DE-4981-A47C-FB8A203105F1	Not Available	11	96
TCGA-C5-A907	FEMALE	163	448	95	35.756	Cervical Squamous Cell Carcinoma	Cervical	Alive				Stage IB2	G2	0	448			TUMOR FREE		47	17	Not Applicable	TCGA-C5-A907	C92696BA-F549-480D-8D4A-5F23B27AA336	Not Available	Not Available	Not Available	Not Applicable	Not Available	1	-17304	Not Applicable	Not Available	Not Available	Not Available	0	Not Available	136	Not Available	Not Available					TCGA-C5-A907-D58147	A838B6D3-A560-4453-A856-6B9D1170211F	Not Available	1	73
TCGA-C5-A1BQ	FEMALE	147	604	69	31.9311	Cervical Squamous Cell Carcinoma	Cervical	Dead				Stage IIIB	G2	0	604			TUMOR FREE		65	12	Not Applicable	TCGA-C5-A1BQ	E77C3F70-08D1-40D3-B038-F09A519423CC	Not Available	Not Available	Not Available	Not Applicable	Not Available	7	-24018	604	Not Available	Not Available	Not Available	0	Not Available	Not Available	Not Available	Not Available					TCGA-C5-A1BQ-D34132	A9F43408-7749-4CDF-9C60-6D3B1C4AE50F	Not Available	30	47
TCGA-EA-A1QS	FEMALE	164	1203	60	22.3081	Cervical Squamous Cell Carcinoma	Cervical	Alive	T1b1	N0	M0	Stage IB1	G2	0	1203			TUMOR FREE		46	Not Available	Not Applicable	TCGA-EA-A1QS	6F9D21C0-3B88-450D-A249-3E9BAFBA2DFA	Never Used	ABSENT	Not Available	Not Applicable	Not Available	6	-16923	Not Applicable	Not Available	Not Available	Not Available	0	Not Available	40	Not Available	Not Available
TCGA-C5-A1M6	FEMALE	165	955	77	28.2828	Cervical Squamous Cell Carcinoma	Cervical	Dead				Stage IIB	G3	1	316	Lung	Distant Metastasis	WITH TUMOR		55	Not Available	Not Applicable	TCGA-C5-A1M6	825a6fbb-aede-436f-800b-c7f096da0a77	Former User	Not Available	Not Available	Not Applicable	Not Available	21	-20090	955	316	Not Available	Not Available	0	Not Available	Not Available	Not Available	Not Available		Bladder Absent;Extra-Pelvic Metastatic Disease Present;Parametrium Absent;Paraaortic Nodes Absent;Pelvic Nodes Absent;Supraclavicular Absent			TCGA-C5-A1M6-D29218;TCGA-C5-A1M6-D33208;TCGA-C5-A1M6-D33209;TCGA-C5-A1M6-D33210;TCGA-C5-A1M6-D33211	90E18313-1409-40E4-AF66-1ED55A60D35B;C82C2709-144B-4A16-A2AB-5A74C1C6427D;8437E363-F915-4549-9B5A-B5E612653094;1D46A633-9DAF-4335-BD53-C5D30B1E79B0;37FC5233-BCCA-45AA-BCC1-7312562622AC	Not Available;Not Available;Not Available;Not Available;Not Available	12;22;22;22;22	489;489;489;489;489
TCGA-EA-A4BA	FEMALE	162	755	96	36.5798	Endocervical Type of Adenocarcinoma	Cervical	Alive	T1b2	N0	M0	Stage IB2	G2	0	755			TUMOR FREE		49	Not Available	Not Applicable	TCGA-EA-A4BA	9E79059F-3453-4AA6-9849-55A267C711A4	Never Used	ABSENT	Not Available	Not Applicable	Not Available	5	-17995	Not Applicable	Not Available	Not Available	Not Available	0	Not Available	10	7	Not Available					TCGA-EA-A4BA-D49909;TCGA-EA-A4BA-D49910;TCGA-EA-A4BA-D49911	18657CF1-F5AA-48A1-BAB8-1B511F341EA4;1780B434-014B-456D-9F14-298A819FC3EB;B4F30A70-2AB7-4FA1-888B-AC1E7096ACAC	Not Available;Not Available;Not Available	14;14;14	134;134;134
TCGA-EK-A3GJ	FEMALE	171	3	96	32.8306	Cervical Squamous Cell Carcinoma	Cervical	Alive	T1b1	N0		Stage IB1	G3	0	3			Discrepancy		51	Not Available	Not Applicable	TCGA-EK-A3GJ	DEDA68DD-E9AD-45CC-9DBB-1C5836EF6519	Not Available	ABSENT	Not Available	Not Applicable	Not Available	3	-18630	Not Applicable	Not Available	Not Available	Not Available	0	Not Available	3	-1	Not Available
TCGA-C5-A1M7	FEMALE	165	1409	69	25.3444	Cervical Squamous Cell Carcinoma	Cervical	Alive	T1b	N0	MX	Stage IB	G2	0	1409			TUMOR FREE		37	16	Not Applicable	TCGA-C5-A1M7	e8e16aaf-3621-4ce8-b02a-7893dd656e4d	Never Used	ABSENT	Not Available	margins free of tumor	Other Location, specify	24	-13808	Not Applicable	Not Available	Not Available	Not Available	0	Not Available	1409	-33	Not Available
TCGA-C5-A2LX	FEMALE	165	2526	65	23.8751	Cervical Squamous Cell Carcinoma	Cervical	Alive	T2	N1	MX	Stage IB1	G2	0	2526			TUMOR FREE		54	18	Not Applicable	TCGA-C5-A2LX	B82F4C6D-530F-4B0E-8F33-995633CB254A	Former User	ABSENT	severe squamous dysplasia (CIN3) extending to the vaginal margin of excision	Not Applicable	Positive vaginal margin	8	-20070	Not Applicable	Not Available	Not Available	31	0	Not Available	491	52	Not Available					TCGA-C5-A2LX-D21317	85A0C61D-EA35-4F65-96E7-BA0F109F33E8	Not Available	8	134
TCGA-VS-A9UP	FEMALE	155	1444	68	28.3039	Mucinous Adenocarcinoma of Endocervical Type	Cervical	Alive	T2a	NX	MX	Stage IIA	G3	1	352	Other, specify	Distant Metastasis	WITH TUMOR		43	34	Not Applicable	TCGA-VS-A9UP	F0CFAACC-30E5-4E54-B33A-F0FD5DAD620E	Never Used	Not Available	Not Available	Not Applicable	Not Available	11	-15849	Not Applicable	Not Available	Not Available	Not Available	0	Not Available	1150	54	Not Available					TCGA-VS-A9UP-D63458	82CD6A7E-AD39-4A38-A53F-0AD1EABE3268	Not Available	11	119
TCGA-EA-A1QT	FEMALE	163	1243	68	25.5937	Cervical Squamous Cell Carcinoma	Cervical	Alive	T1b	N0	M0	Stage IB	G2	0	1243			Not Available		47	Not Available	Not Applicable	TCGA-EA-A1QT	970b619f-2eb5-4557-a7b8-5def35943c58	Never Used	ABSENT	Not Available	Not Applicable	Not Available	3	-17475	Not Applicable	Not Available	Not Available	Not Available	0	Not Available	8	Not Available	Not Available
TCGA-ZJ-A8QQ	FEMALE	158	2056	71	28.441	Cervical Squamous Cell Carcinoma	Cervical	Alive	T1b2	N0	M0	Stage IIB	GX	0	2056			TUMOR FREE		24	11	Not Applicable	TCGA-ZJ-A8QQ	B12DEB95-6AA1-49CB-A3C5-A711D42D6FB9	Never Used	Not Available	Not Available	Not Applicable	Not Available	25	-8918	Not Applicable	Not Available	Not Available	Not Available	0	Not Available	2056	845	Not Available					TCGA-ZJ-A8QQ-D56891	D9393162-CBD7-4C44-926C-6511920A4C85	Not Available	25	90
TCGA-FU-A3TQ	FEMALE	152	795	59	25.5367	Cervical Squamous Cell Carcinoma	Cervical	Alive	T2b	N1	MX	Stage IIIB	G2	0	795			TUMOR FREE		55	30	Not Applicable	TCGA-FU-A3TQ	7218AA6F-3345-484F-A329-A3B6169A67C7	Unknown	PRESENT	Not Available	Not Applicable	Not Available	6	-20302	Not Applicable	Not Available	Not Available	Not Available	0	Not Available	48	Not Available	Not Available
TCGA-VS-A8EB	FEMALE	153	305	64	27.3399	Cervical Squamous Cell Carcinoma	Cervical	Dead	T3b	NX	M1	Stage IIIB	GX	0	305			WITH TUMOR		41	Not Available	Not Applicable	TCGA-VS-A8EB	2C736C5C-9D32-4522-ACFD-6620BC291ACE	Never Used	Not Available	Not Available	Not Applicable	Not Available	22	-15215	305	Not Available	Not Available	Not Available	0	Not Available	Not Available	28	Not Available
TCGA-EA-A3HT	FEMALE	163	954	83	31.2394	Cervical Squamous Cell Carcinoma	Cervical	Alive	T1b	N0	M0	Stage IB	G1	0	954			TUMOR FREE		68	Not Available	Not Applicable	TCGA-EA-A3HT	3C5B2452-014B-495F-B86A-F522ED84BC3B	Never Used	ABSENT	Not Available	Not Applicable	Not Available	20	-25138	Not Applicable	Not Available	Not Available	Not Available	0	Not Available	19	Not Available	Not Available
TCGA-C5-A8XJ	FEMALE	160	4467	114	44.5312	Cervical Squamous Cell Carcinoma	Cervical	Alive				Stage IB	Not Available	0	4467			TUMOR FREE		74	Not Available	Not Applicable	TCGA-C5-A8XJ	E89D0CB1-6EC2-43EE-A6D9-B922B680AF34	Not Available	Not Available	Not Available	Not Applicable	Not Available	17	-27087	Not Applicable	Not Available	Not Available	Not Available	0	Not Available	2305	Not Available	Not Available					TCGA-C5-A8XJ-D58645	3FCF68B3-E355-4DA0-9C94-B6149603DF9A	Not Available	17	77
TCGA-C5-A1BI	FEMALE	157	1112	59	23.9361	Cervical Squamous Cell Carcinoma	Cervical	Alive				Stage IIIB	G2	0	1112			TUMOR FREE		31	16	Not Applicable	TCGA-C5-A1BI	91310434-2a99-4e1d-81e6-3d58d097089f	Former User	Not Available	Not Available	Not Applicable	Not Available	12	-11564	Not Applicable	1	Not Available	16	0	Not Available	1112	Not Available	Not Available		Bladder Absent;Extra-Pelvic Metastatic Disease Absent;Parametrium Absent;Paraaortic Nodes Absent;Pelvic Nodes Absent;Supraclavicular Absent			TCGA-C5-A1BI-D30513	CD5F4D29-A387-4D5D-AC20-A519665F404D	Not Available	11	74
TCGA-VS-A9V4	FEMALE	161	132	52	20.061	Mucinous Adenocarcinoma of Endocervical Type	Cervical	Dead	T4	NX	MX	Stage IVA	G2	1	100		New Primary Tumor	WITH TUMOR		63	15	Not Applicable	TCGA-VS-A9V4	778389BA-C2E9-47D4-B133-6F4D0E689B34	Not Available	Not Available	Not Available	Not Applicable	Not Available	1	-23334	132	Not Available	Not Available	Not Available	0	Not Available	Not Available	-1	Not Available					TCGA-VS-A9V4-D63703	DCD18A3F-9FC6-43E2-8376-4A4E7D24C11C	Not Available	15	107
TCGA-C5-A1ME	FEMALE	165	1756	69	25.3444	Endocervical Type of Adenocarcinoma	Cervical	Alive	T1b1	N0	M0	Stage IB1	G1	0	1756			TUMOR FREE		40	18	Not Applicable	TCGA-C5-A1ME	a0598331-79e1-418d-b50c-fd945b843506	Former User	ABSENT	Not Available	margins free of tumor	Other Location, specify	19	-14970	Not Applicable	13	Not Available	Not Available	0	Not Available	132	Not Available	Not Available
TCGA-JX-A3PZ	FEMALE	175	642	58	18.9388	Cervical Squamous Cell Carcinoma	Cervical	Dead	T1b	N0	M0	Stage IB	G2	1	617	Other, specify	Distant Metastasis	WITH TUMOR		25	Not Available	Not Applicable	TCGA-JX-A3PZ	3DF6ABE2-2123-4BFA-A4E4-88DF5F940C04	Never Used	ABSENT	Not Available	Not Applicable	Unknown	17	-9303	642	-1	Not Available	Not Available	0	Not Available	Not Available	538	Not Available		Bladder Absent;Extra-Pelvic Metastatic Disease Absent;Parametrium Present;Paraaortic Nodes Absent;Pelvic Nodes Absent;Unknown
TCGA-EK-A2RD	FEMALE	161	2	114	43.9798	Cervical Squamous Cell Carcinoma	Cervical	Alive	T1b1	N0	MX	Stage IB1	G2	0	2			TUMOR FREE		47	Not Available	Not Applicable	TCGA-EK-A2RD	16363EF7-899D-4927-A74B-E7C03B3D8AF1	Not Available	Not Available	Not Available	Not Applicable	Not Available	5	-17191	Not Applicable	Not Available	Not Available	Not Available	0	Not Available	2	0	Not Available
TCGA-FU-A3TX	FEMALE	Not Available	45	67		Cervical Squamous Cell Carcinoma	Cervical	Alive	T1b2	N0	M0	Stage IB2	G3	0	45			Unknown		78	20	Not Applicable	TCGA-FU-A3TX	B75644C2-B515-41CE-9B03-842EF5208A17	Not Available	Not Available	Not Available	Not Applicable	Not Available	6	-28825	Not Applicable	8	Not Available	8	0	Not Available	45	Not Available	Not Available		Unknown;Unknown;Unknown;Unknown;Unknown;Unknown
TCGA-DG-A2KJ	FEMALE	Not Available	2893	Not Available		Cervical Squamous Cell Carcinoma	Cervical	Alive	T1b	N1	M0	Stage IIIB	G3	0	2893			TUMOR FREE		50	Not Available	Not Applicable	TCGA-DG-A2KJ	7C93642D-7E05-40F8-B1EF-A014EDCFBA42	Unknown	ABSENT	Not Available	Not Applicable	Not Available	10	-18453	Not Applicable	Not Available	Not Available	Not Available	0	Not Available	1791	Not Available	Not Available		Bladder Absent;Unknown;Parametrium Absent;Paraaortic Nodes Absent;Pelvic Nodes Absent;Supraclavicular Absent		Bladder Absent;Extra-Pelvic Metastatic Disease Absent;Parametrium Absent;Paraaortic Nodes Absent;Pelvic Nodes Absent;Supraclavicular Absent	TCGA-DG-A2KJ-D58846	FDC804FE-9CBF-44F9-BAD5-F9056C21DD23	Not Available	25	175
TCGA-MA-AA3Z	FEMALE	160	595	84	32.8125	Cervical Squamous Cell Carcinoma	Cervical	Alive	T1b2	N0	M0	Stage IB2	GX	0	595			TUMOR FREE		43	Not Available	Not Applicable	TCGA-MA-AA3Z	BC2003B9-D489-4559-8672-D9FD2D82F2E8	Former User	Not Available	Not Available	Not Applicable	Not Available	16	-15762	Not Applicable	41	Not Available	52	0	Not Available	469	36	Not Available		Bladder Absent;Extra-Pelvic Metastatic Disease Absent;Parametrium Absent;Paraaortic Nodes Absent;Pelvic Nodes Absent;Supraclavicular Absent
TCGA-VS-A9U7	FEMALE	157	1472	82	33.2671	Cervical Squamous Cell Carcinoma	Cervical	Alive	T1b	N1	M0	Stage IB1	G3	0	1472			TUMOR FREE		30	Not Available	Not Applicable	TCGA-VS-A9U7	6D01421E-D533-4967-8422-97FBC0FB0895	Current User	Not Available	Not Available	Not Applicable	Not Available	11	-11210	Not Applicable	Not Available	Not Available	Not Available	0	Not Available	1108	0	Not Available					TCGA-VS-A9U7-D63460	188BFB3C-D196-47B2-9C99-4FACCD06ADE7	Not Available	11	220
TCGA-EA-A97N	FEMALE	160	11	60	23.4375	Cervical Squamous Cell Carcinoma	Cervical	Alive	T1b2	N0	M0	Stage IB2	G2	0	11			TUMOR FREE		38	Not Available	Not Applicable	TCGA-EA-A97N	87E701AB-ACFD-45F2-A12E-323C94E5F3D5	Never Used	ABSENT	Not Available	Not Applicable	Not Available	18	-13984	Not Applicable	Not Available	Not Available	Not Available	0	Not Available	11	11	Not Available
TCGA-VS-A8QC	FEMALE	152	350	90	38.9543	Cervical Squamous Cell Carcinoma	Cervical	Dead	TX	NX	MX	Stage IVA	G2	1	263		Distant Metastasis	WITH TUMOR		51	Not Available	Not Applicable	TCGA-VS-A8QC	CB695FDD-381E-4C00-836E-0BA27E32176B	Unknown	Not Available	Not Available	Not Applicable	Not Available	30	-18743	350	Not Available	Not Available	Not Available	0	Not Available	Not Available	-1	Not Available					TCGA-VS-A8QC-D61994	31286449-EDE9-4BC3-ADA7-30943A71494A	Not Available	10	175
TCGA-XS-A8TJ	FEMALE	146	890	51	23.9257	Cervical Squamous Cell Carcinoma	Cervical	Alive	T1b1	N1	M0	Stage IB1	G2	0	890			TUMOR FREE		41	Not Available	Not Applicable	TCGA-XS-A8TJ	FFD8D31F-BC4B-4E19-BBAF-0E26E9F3A107	Former User	ABSENT	Not Available	FREE MARGINS	Other Location, specify	28	-15298	Not Applicable	Not Available	Not Available	Not Available	0	Not Available	890	0	Not Available					TCGA-XS-A8TJ-D63711;TCGA-XS-A8TJ-D63712	B4F2E7FC-3BE4-456A-9C73-7E967A8E4987;350F7016-7FBD-47FB-B090-E4F49213D592	Not Available;Not Available	15;15	155;155
TCGA-FU-A3WB	FEMALE	167	491	89	31.9122	Cervical Squamous Cell Carcinoma	Cervical	Alive	T2a2	N0	MX	Stage IIA2	G2	0	491			TUMOR FREE		43	16	Not Applicable	TCGA-FU-A3WB	6868BA1D-B612-454C-8146-74AF2F573D76	Former User	ABSENT	Not Available	Not Applicable	Not Available	24	-15833	Not Applicable	Not Available	Not Available	Not Available	0	Not Available	25	0	Not Available					TCGA-FU-A3WB-D64235;TCGA-FU-A3WB-D64236	7C60D850-1A5A-45EF-BF33-1DA000A277BA;80E759F8-CE9D-4730-A538-D10A3C87F4C7	Not Available;Not Available	27;27	116;116
TCGA-VS-A954	FEMALE	160	1714	58	22.6562	Cervical Squamous Cell Carcinoma	Cervical	Alive	T3b	NX	MX	Stage IIIB	G2	0	1714			TUMOR FREE		67	Not Available	Not Applicable	TCGA-VS-A954	9BA72A77-AEF0-4788-8072-60C28902E55D	Never Used	Not Available	Not Available	Not Applicable	Not Available	21	-24498	Not Applicable	Not Available	Not Available	Not Available	0	Not Available	1295	92	Not Available					TCGA-VS-A954-D62797	31C84693-FA3B-435F-8746-78CEA4D4B89F	Not Available	24	122
TCGA-MU-A8JM	FEMALE	165	607	86	31.5886	Cervical Squamous Cell Carcinoma	Cervical	Alive	T1b	N0	MX	Stage IB1	G2	0	607			TUMOR FREE		46	16	Not Applicable	TCGA-MU-A8JM	1D730565-FFA9-4CC7-A713-C4B5B7BBB29F	Unknown	Unknown	Not Available	Not Applicable	Microscopic parametrial involvement	9	-17156	Not Applicable	Not Available	Not Available	28	0	Not Available	165	Not Available	Not Available
TCGA-JW-A5VL	FEMALE	160	474	71	27.7344	Cervical Squamous Cell Carcinoma	Cervical	Alive	T1b2	NX	MX	Stage IB2	G1	0	474			TUMOR FREE		37	Not Available	N/A	TCGA-JW-A5VL	D1A5B028-EC79-456B-81A1-69838E2922DF	Unknown	Not Available	Not Available	Not Applicable	Not Available	31	-13604	Not Applicable	14	Not Available	Not Available	0	Not Available	88	-4	Not Available		Pelvic Nodes Present
TCGA-EA-A5ZD	FEMALE	154	830	47	19.8178	Cervical Squamous Cell Carcinoma	Cervical	Alive	T1b1	N0	M0	Stage IB1	G2	0	830			TUMOR FREE		40	Not Available	Not Applicable	TCGA-EA-A5ZD	35D677B6-0487-44D3-BBBA-651EAC7E0635	Unknown	ABSENT	Not Available	Not Applicable	Unknown	24	-14629	Not Applicable	Not Available	Not Available	Not Available	0	Not Available	21	Not Available	Not Available
TCGA-EK-A2H0	FEMALE	156	1847	88	36.1604	Cervical Squamous Cell Carcinoma	Cervical	Alive				Stage IIB	G3	0	1847			TUMOR FREE		24	Not Available	Not Applicable	TCGA-EK-A2H0	C83C52F4-3815-4F49-8218-CF80AAA62E2F	Not Available	Not Available	Not Available	Not Applicable	Not Available	3	-8918	Not Applicable	Not Available	Not Available	21	0	Not Available	1398	28	Not Available					TCGA-EK-A2H0-D31970	3CF33478-3029-494E-AE79-DF669875863C	Not Available	14	90
TCGA-DS-A1OA	FEMALE	160	879	51	19.9219	Cervical Squamous Cell Carcinoma	Cervical	Dead	T1b1	N1	M0	Stage IB	G3	1	379		Locoregional Recurrence	WITH TUMOR		77	Not Available	Not Applicable	TCGA-DS-A1OA	46c67dd6-8e66-411d-ad05-95daa9005eb2	Never Used	ABSENT	Not Available	None	Other Location, specify	12	-28160	879	24	Not Available	Not Available	0	Not Available	Not Available	29	Not Available		Bladder Absent;Extra-Pelvic Metastatic Disease Absent;Parametrium Absent;Paraaortic Nodes Absent;Pelvic Nodes Present;Supraclavicular Absent			TCGA-DS-A1OA-D15180;TCGA-DS-A1OA-D15318;TCGA-DS-A1OA-D15182;TCGA-DS-A1OA-D15181;TCGA-DS-A1OA-D15179	72D1CA7A-6404-463A-B036-A3AB953DAE03;1C316E84-6CA7-434F-BE32-6A8AEE5B89A9;EE9F6CF1-BC40-4073-A3AD-390DACD90E15;7798FE45-492F-423C-B95A-100F4A4BE5A8;F3F96461-3EEB-4FE9-9B1A-7B6C71D1D4CB	Not Available;Not Available;Not Available;Not Available;Not Available	12;12;12;12;12	596;786;702;682;91
TCGA-DG-A2KL	FEMALE	155	1367	75	31.2175	Cervical Squamous Cell Carcinoma	Cervical	Alive	T2a	N0	M0	Stage IIA	G1	0	1367			TUMOR FREE		53	Not Available	Not Applicable	TCGA-DG-A2KL	2DA977FC-8B46-4C40-9636-B12FD36A98E4	Unknown	ABSENT	Not Available	Not Applicable	Positive vaginal margin	20	-19539	Not Applicable	Not Available	Not Available	Not Available	0	Not Available	1367	Not Available	Not Available		Bladder Absent;Unknown;Parametrium Absent;Unknown;Pelvic Nodes Absent;Unknown			TCGA-DG-A2KL-D61036	DE7C7E8A-DFA5-4D71-9D40-1A65B07AA599	Not Available	20	169
TCGA-EA-A3QD	FEMALE	163	397	105	39.5197	Cervical Squamous Cell Carcinoma	Cervical	Alive	T1b1	N1	M0	Stage IIIB	G3	0	397			TUMOR FREE		59	Not Available	Not Applicable	TCGA-EA-A3QD	9E2E29E8-D94A-499F-A98A-5B53B2C38F3B	Former User	Not Available	Not Available	Not Applicable	Not Available	30	-21655	Not Applicable	Not Available	Not Available	Not Available	0	Not Available	33	33	Not Available					TCGA-EA-A3QD-D58164	342CF8C0-1020-45FF-9C5C-D96128CB5368	Not Available	8	109
TCGA-VS-A9U6	FEMALE	156	1320	66	27.1203	Cervical Squamous Cell Carcinoma	Cervical	Alive	T4	NX	M1	Stage IVB	GX	1	711		Distant Metastasis	WITH TUMOR		52	Not Available	Not Applicable	TCGA-VS-A9U6	98784BBE-E286-48DF-838D-1A88040658BF	Never Used	Not Available	Not Available	Not Applicable	Not Available	11	-19109	Not Applicable	Not Available	Not Available	Not Available	0	Not Available	1213	0	Not Available					TCGA-VS-A9U6-D63446	BDE69B17-53CF-4220-96CA-A9006A4A466E	Not Available	11	105
TCGA-Q1-A5R2	FEMALE	160	499	76	29.6875	Cervical Squamous Cell Carcinoma	Cervical	Alive	TX	NX	MX		G3	0	499			WITH TUMOR		64	Not Available	Not Applicable	TCGA-Q1-A5R2	F3CBADB3-3B83-47CD-B8A0-B0E10343A295	Former User	Unknown	Not Available	Not Applicable	Not Available	26	-23523	Not Applicable	Not Available	Not Available	Not Available	0	Not Available	105	105	Not Available					TCGA-Q1-A5R2-D48279	56934D77-B222-4F09-B296-CCA334AAD2D7	N/A	11	48
TCGA-C5-A7UI	FEMALE	Not Available	2888	86		Cervical Squamous Cell Carcinoma	Cervical	Dead	T1b1	N0	MX	Stage IB1	G3	0	2888			TUMOR FREE		42	Not Available	Not Applicable	TCGA-C5-A7UI	CE5765FB-5221-4CBF-AA76-BB863803DF57	Not Available	Not Available	Not Available	margins free of tumor	Other Location, specify	1	-15349	2888	Not Available	Not Available	Not Available	0	Not Available	Not Available	Not Available	Not Available
TCGA-IR-A3LB	FEMALE	168	2032	94	33.305	Endocervical Type of Adenocarcinoma	Cervical	Dead	T1b1	N0	M0	Stage IB1	G3	1	317	Lung	Distant Metastasis	WITH TUMOR		53	17	Not Applicable	TCGA-IR-A3LB	E7C7783C-1D0F-4F42-A4CF-518825E91D91	Never Used	ABSENT	Not Available	Not Applicable	Not Available	24	-19374	2032	Not Available	Not Available	Not Available	0	Not Available	Not Available	Not Available	Not Available					TCGA-IR-A3LB-D39501;TCGA-IR-A3LB-D39503;TCGA-IR-A3LB-D39505;TCGA-IR-A3LB-D39507	7E1FA50E-B5AD-448C-8001-B6D877993913;2DAC5EBB-CAE7-49CB-A810-509E31040F63;F04625F9-2C4F-4B6F-944D-C730D8BB68AC;694F1C43-677B-4B42-AB0F-DF306C5C99EA	Not Available;Not Available;Not Available;Not Available	24;24;24;24	138;141;500;500
TCGA-C5-A1MP	FEMALE	Not Available	109	Not Available		Cervical Squamous Cell Carcinoma	Cervical	Alive	T1b2	N1	MX	Stage IB2	G3	0	109			TUMOR FREE		34	Not Available	Not Applicable	TCGA-C5-A1MP	08a52bcf-d2e9-497b-938a-4660c332e914	Not Available	Not Available	Not Available	margins free of tumor	Other Location, specify	21	-12692	Not Applicable	7	Not Available	7	0	Not Available	109	Not Available	Not Available
TCGA-EX-A449	FEMALE	168	447	107	37.911	Endocervical Type of Adenocarcinoma	Cervical	Alive	T1b1	NX	M1	Stage IVB	G1	0	447			WITH TUMOR		42	Not Available	Not Applicable	TCGA-EX-A449	EB0EB159-732E-43FF-A402-7F2D9F67DAA8	Not Available	ABSENT	Not Available	Not Applicable	Macroscopic parametrial involvement	1	-15559	Not Applicable	-12	Not Available	Not Available	0	Not Available	34	Not Available	Not Available		Extra-Pelvic Metastatic Disease Absent;Parametrium Present;Paraaortic Nodes Absent;Pelvic Nodes Absent			TCGA-EX-A449-D47410;TCGA-EX-A449-D47412;TCGA-EX-A449-D47413	F031D1DD-20A0-4CFE-93B8-51E09B7099EC;1CA76EBB-F1FB-4769-BE88-45DF8439B867;6D6F9C3B-74AC-4E3B-8DEF-41396B7471D1	Not Available;Not Available;Not Available	27;27;27	109;200;200
TCGA-JX-A3Q0	FEMALE	166	6375	57	20.6852	Cervical Squamous Cell Carcinoma	Cervical	Alive	T3	N0	M0	Stage III	G2	0	6375			TUMOR FREE		63	24	Not Applicable	TCGA-JX-A3Q0	20280122-A66A-4C83-8F25-0B9D97558DC2	Never Used	Not Available	Not Available	Not Applicable	Not Available	17	-23313	Not Applicable	-1	Not Available	Not Available	0	Not Available	5957	89	Not Available		Extra-Pelvic Metastatic Disease Present
TCGA-VS-A8QH	FEMALE	159	1210	73	28.8754	Mucinous Adenocarcinoma of Endocervical Type	Cervical	Dead	TX	NX	MX	Stage IB1	G2	0	1210			WITH TUMOR		76	Not Available	Not Applicable	TCGA-VS-A8QH	C4F61715-EE58-4799-A5F4-0F5E27C4093D	Unknown	Not Available	Not Available	Not Applicable	Not Available	30	-27909	1210	Not Available	Not Available	Not Available	0	Not Available	Not Available	-1	Not Available					TCGA-VS-A8QH-D62005;TCGA-VS-A8QH-D65297	BBB1806B-37D4-4DAD-BA0D-870901A18049;D1392037-BB2A-4CF5-8421-BE274E5395F2	Not Available;Not Available	10;21	98;98
TCGA-DG-A2KH	FEMALE	Not Available	34	Not Available		Adenosquamous	Cervical	Alive	T1b1	N0	M0	Stage IB1	GX	0	34			Unknown		25	Not Available	Not Applicable	TCGA-DG-A2KH	6248F2A3-0DA9-419F-AB77-C3F6F4353EB5	Unknown	ABSENT	The pelvic nodules show circumscribed area of adipose tissue with local fat necrosis. No evidence of malignancy within this pelvic nodule.	Not Applicable	Not Available	11	-9209	Not Applicable	Not Available	Not Available	Not Available	0	Not Available	34	Not Available	Not Available
TCGA-BI-A0VR	FEMALE	Not Available	1505	Not Available		Cervical Squamous Cell Carcinoma	Cervical	Alive	T2b	N1	M0	Stage IIIB	G3	0	1505			TUMOR FREE		53	22	Not Applicable	TCGA-BI-A0VR	39a3120c-0889-4a10-816a-e07528a35f7a	Not Available	PRESENT	Not Available	Not Applicable	Not Available	1	-19473	Not Applicable	15	Not Available	Not Available	0	Not Available	1505	Not Available	Not Available		Bladder Absent;Extra-Pelvic Metastatic Disease Absent;Parametrium Absent;Paraaortic Nodes Absent;Pelvic Nodes Absent;Supraclavicular Absent
TCGA-C5-A8YR	FEMALE	Not Available	837	80		Cervical Squamous Cell Carcinoma	Cervical	Dead	T1b	N0	M0	Stage IB	G3	1	272		Locoregional Recurrence	Unknown		56	Not Available	Not Applicable	TCGA-C5-A8YR	BE8B1C78-8CB1-4BFF-B1FE-71ECDC454C94	Not Available	Not Available	Not Available	Not Applicable	Not Available	1	-20672	837	Not Available	Not Available	Not Available	0	Not Available	Not Available	Not Available	Not Available
TCGA-FU-A2QG	FEMALE	170	579	138	47.7509	Cervical Squamous Cell Carcinoma	Cervical	Alive	T1b1	N0		Stage IB1	G2	0	579			TUMOR FREE		29	14	Not Applicable	TCGA-FU-A2QG	D5D8A818-D689-4C6F-96B0-13F2CB10C3CA	Former User	Not Available	Not Available	Not Applicable	Not Available	18	-10865	Not Applicable	Not Available	Not Available	Not Available	0	Not Available	28	Not Available	Not Available
TCGA-EK-A2R9	FEMALE	162	4	185	70.4923	Cervical Squamous Cell Carcinoma	Cervical	Alive	T1b1	N0		Stage IB1	G3	0	4			WITH TUMOR		58	Not Available	Not Applicable	TCGA-EK-A2R9	00AD0FFE-2105-4829-A495-1C2ACEB5BB31	Not Available	ABSENT	Not Available	Not Applicable	Not Available	7	-21242	Not Applicable	Not Available	Not Available	Not Available	0	Not Available	4	0	Not Available
TCGA-EA-A556	FEMALE	160	453	62	24.2188	Endometrioid Adenocarcinoma of Endocervix	Cervical	Alive	T1b1	N0	M0	Stage IB1	G3	0	453			TUMOR FREE		38	18	Not Applicable	TCGA-EA-A556	2D34E9A3-298C-4365-B7A1-A507C7F069CD	Never Used	ABSENT	Not Available	Not Applicable	Unknown	22	-13988	Not Applicable	Not Available	Not Available	Not Available	0	Not Available	0	-1	Not Available
TCGA-C5-A2M2	FEMALE	Not Available	1011	Not Available		Endocervical Type of Adenocarcinoma	Cervical	Dead				Stage IB2	G2	0	1011			Not Available		56	24	Not Applicable	TCGA-C5-A2M2	77D53D4D-3B07-4C79-86FE-6AC812968F39	Former User	Not Available	Not Available	Not Applicable	Not Available	4	-20480	Not Applicable	Not Available	Not Available	18	0	Not Available	25	Not Available	Not Available
TCGA-C5-A7CJ	FEMALE	163	3097	60	22.5827	Cervical Squamous Cell Carcinoma	Cervical	Dead	T2a	N1	MX	Stage IIA	G2	0	3097			TUMOR FREE		42	22	Not Applicable	TCGA-C5-A7CJ	F8F470D2-924F-41DD-92C5-516B0BF68E44	Not Available	Not Available	Not Available	margins free of tumor	Other Location, specify	3	-15652	3097	Not Available	Not Available	Not Available	0	Not Available	Not Available	Not Available	Not Available					TCGA-C5-A7CJ-D56515	1AACD955-9EB2-4DFA-BA7A-89FD85626A3E	Not Available	11	Not Available
TCGA-HM-A6W2	FEMALE	160	287	89	34.7656	Adenosquamous	Cervical	Alive	T2a	N0	M1	Stage IVB	G3	0	287			Unknown		34	27	Not Applicable	TCGA-HM-A6W2	929505F7-0270-475E-A9D6-00BF38DC78BA	Former User	Not Available	Metastases to Right Ovary	Not Applicable	Not Available	18	-12775	Not Applicable	9	Not Available	62	0	Not Available	125	28	Not Available		Unknown;Paraaortic Nodes Absent;Pelvic Nodes Absent			TCGA-HM-A6W2-D50249	B41660FF-ED31-4FF2-B0DD-57253CB818F8	Not Available	18	120
TCGA-C5-A0TN	FEMALE	Not Available	348	55		Cervical Squamous Cell Carcinoma	Cervical	Dead	T1b	N1	MX	Stage IB2	G3	1	62	Other, specify	Distant Metastasis	WITH TUMOR		21	Not Available	Not Applicable	TCGA-C5-A0TN	14c65927-b9dd-4ef6-9917-db7bc431ff2f	Not Available	ABSENT	Not Available	Not Applicable	Microscopic parametrial involvement	23	-7760	348	Not Available	-2	Not Available	0	Not Available	Not Available	Not Available	Not Available				Bladder Absent;Extra-Pelvic Metastatic Disease Absent;Parametrium Absent;Paraaortic Nodes Absent;Pelvic Nodes Absent;Supraclavicular Absent	TCGA-C5-A0TN-D30749	1E4E1C91-1CF4-4AE9-A35F-599B3586D121	Not Available	16	Not Available
TCGA-BI-A0VS	FEMALE	Not Available	1735	Not Available		Cervical Squamous Cell Carcinoma	Cervical	Alive	T1b1	N0	M0	Stage IB	G3	0	1735			TUMOR FREE		48	Not Available	Not Applicable	TCGA-BI-A0VS	3923a64a-f8d7-4e3e-9218-cee642da21db	Not Available	Not Available	Not Available	Not Applicable	Not Available	5	-17839	Not Applicable	12	Not Available	12	0	Not Available	925	Not Available	Not Available		Bladder Absent;Extra-Pelvic Metastatic Disease Absent;Parametrium Absent;Paraaortic Nodes Absent;Pelvic Nodes Absent;Supraclavicular Absent		Bladder Absent;Extra-Pelvic Metastatic Disease Absent;Parametrium Absent;Paraaortic Nodes Absent;Pelvic Nodes Absent;Supraclavicular Absent
TCGA-EK-A2PG	FEMALE	155	46	55	22.8928	Cervical Squamous Cell Carcinoma	Cervical	Alive					G3	0	46			Not Available		88	Not Available	Not Applicable	TCGA-EK-A2PG	5194A247-CFEE-4C11-9475-CF5521A8C6E3	Not Available	Not Available	Not Available	Not Applicable	Not Available	12	-32500	Not Applicable	Not Available	Not Available	Not Available	0	Not Available	16	0	Not Available
TCGA-C5-A7CM	FEMALE	168	619	75	26.5731	Endocervical Adenocarcinoma of the Usual Type	Cervical	Alive				Stage IB2	G2	0	619			TUMOR FREE		35	Not Available	Not Applicable	TCGA-C5-A7CM	D223FF09-B80B-4368-9D80-A59DFBE4D820	Not Available	Not Available	Not Available	Not Applicable	Not Available	3	-12853	Not Applicable	Not Available	Not Available	Not Available	0	Not Available	294	294	Not Available					TCGA-C5-A7CM-D56984	CD77064F-E9A7-42BE-B00B-4932416F1705	Not Available	27	84
TCGA-VS-A958	FEMALE	151	1525	61	26.7532	Cervical Squamous Cell Carcinoma	Cervical	Alive	T2b	NX	MX	Stage IIB	G2	0	1525			TUMOR FREE		46	Not Available	Not Applicable	TCGA-VS-A958	97CF3268-9756-4659-9E98-F200F96A91F4	Never Used	Not Available	Not Available	Not Applicable	Not Available	21	-16905	Not Applicable	Not Available	Not Available	Not Available	0	Not Available	1333	0	Not Available					TCGA-VS-A958-D62804	4B8E9E37-3369-4E1F-9D37-45B1B326F4A0	Not Available	24	83
TCGA-EK-A2GZ	FEMALE	160	383	64	25	Cervical Squamous Cell Carcinoma	Cervical	Alive				Stage IIIB	G2	1				WITH TUMOR		64	Not Available	Not Applicable	TCGA-EK-A2GZ	D7F07485-522A-49D9-B105-5A9A51ACA8F7	Not Available	Not Available	Not Available	Not Applicable	Not Available	8	-23599	Not Applicable	Not Available	Not Available	-3	0	Not Available	383	-1	Not Available
TCGA-UC-A7PG	FEMALE	Not Available	370	82		Cervical Squamous Cell Carcinoma	Cervical	Dead	T3b	N1	MX	Stage IIIB	G1	0	370			WITH TUMOR		44	18	Not Applicable	TCGA-UC-A7PG	53D99A89-6EBD-4637-91DB-7CE43EBC6B8B	Unknown	Unknown	Not Available	Not Applicable	Not Available	17	-16231	370	-54	Not Available	Not Available	0	Not Available	Not Available	-10	Not Available		Unknown;Unknown;Unknown;Paraaortic Nodes Absent;Pelvic Nodes Absent;Supraclavicular Absent			TCGA-UC-A7PG-D61868	DB97B514-17D5-4D9A-9C22-0896A63486ED	Not Available	17	90
TCGA-RA-A741	FEMALE	165	444	86	31.5886	Cervical Squamous Cell Carcinoma	Cervical	Alive				Stage IIB	GX	0	444			Unknown		34	21	Not Applicable	TCGA-RA-A741	BDAD2F13-EDE2-4AAD-91A4-BF60F8888BF2	Unknown	Not Available	Not Available	Not Applicable	Not Available	13	-12607	Not Applicable	-15	14	Not Available	0	Not Available	118	0	Not Available		Unknown;Unknown;Unknown;Unknown;Pelvic Nodes Absent;Unknown		Bladder Absent;Unknown;Parametrium Absent;Paraaortic Nodes Absent;Pelvic Nodes Absent;Unknown	TCGA-RA-A741-D51218;TCGA-RA-A741-D51219;TCGA-RA-A741-D56699;TCGA-RA-A741-D66182	CA996310-983C-4D64-A2A3-1AD4558A97F2;27032B2D-9885-4398-B8E1-82EF7C0D1194;B52F8D6F-C07A-453C-A246-B713967195E8;E0AD8182-60F5-46E5-8B7E-C8623125249C	Not Available;Not Available;Not Available;Not Available	13;13;19;3	254;254;76;254
TCGA-EK-A3GN	FEMALE	160	27	83	32.4219	Cervical Squamous Cell Carcinoma	Cervical	Alive	TX	NX		Stage IIIB	G3	1				WITH TUMOR		47	Not Available	Not Applicable	TCGA-EK-A3GN	F727FCB9-E457-4643-9468-F739133B7E9C	Not Available	ABSENT	Not Available	Not Applicable	Not Available	2	-17425	Not Applicable	Not Available	Not Available	Not Available	0	Not Available	1	0	Not Available
TCGA-EK-A2PI	FEMALE	162	586	53	20.1951	Cervical Squamous Cell Carcinoma	Cervical	Alive				Stage IIIB	G2	0	586			WITH TUMOR		44	Not Available	Not Applicable	TCGA-EK-A2PI	BFD82578-8B60-4C23-85A1-FC14A1CF5F12	Not Available	Not Available	Not Available	Not Applicable	Not Available	1	-16324	Not Applicable	Not Available	Not Available	Not Available	0	Not Available	0	0	Not Available
TCGA-C5-A1MJ	FEMALE	165	14	75	27.5482	Endocervical Type of Adenocarcinoma	Cervical	Dead	T1b1	N0	MX	Stage IB1	G2	0	14			TUMOR FREE		61	Not Available	Not Applicable	TCGA-C5-A1MJ	23f011e2-c025-4494-8016-2140cc8d4bce	Not Available	ABSENT	Not Available	margins free of tumor	Other Location, specify	21	-22308	14	Not Available	Not Available	Not Available	0	Not Available	Not Available	Not Available	Not Available
TCGA-DS-A0VN	FEMALE	165	3609	81	29.7521	Cervical Squamous Cell Carcinoma	Cervical	Alive	T1b2	N0	M0	Stage IB	G2	0	3609			TUMOR FREE		47	Not Available	Not Applicable	TCGA-DS-A0VN	f8d342f5-9b92-42e1-8b0d-0876cc26965d	Former User	ABSENT	Not Available	deep cervical	Other Location, specify	4	-17433	Not Applicable	8	Not Available	Not Available	0	Not Available	2910	18	Not Available		Bladder Absent;Extra-Pelvic Metastatic Disease Absent;Parametrium Absent;Paraaortic Nodes Absent;Pelvic Nodes Absent;Supraclavicular Absent			TCGA-DS-A0VN-D8738	c2d25fd5-44c6-400a-8857-33092a62271c	Not Available	4	64
TCGA-EA-A3HS	FEMALE	169	959	54	18.9069	Cervical Squamous Cell Carcinoma	Cervical	Alive	T1b	N0	M0	Stage IB	G1	0	959			TUMOR FREE		35	Not Available	Not Applicable	TCGA-EA-A3HS	753EE373-FBCF-4349-B9B2-5A41936E27E9	Never Used	ABSENT	Not Available	Not Applicable	Not Available	20	-13117	Not Applicable	Not Available	Not Available	Not Available	0	Not Available	40	Not Available	Not Available
TCGA-EX-A8YF	FEMALE	168	473	57	20.1956	Cervical Squamous Cell Carcinoma	Cervical	Alive	T2a1	N0	M0	Stage IB1	G3	1	396	Other, specify	Locoregional Recurrence	TUMOR FREE		44	Not Available	Not Applicable	TCGA-EX-A8YF	1DFB4565-81E1-4A1B-BB59-9B5629D6C447	Not Available	Not Available	Not Available	Not Applicable	Not Available	13	-16258	Not Applicable	21	Not Available	Not Available	0	Not Available	144	Not Available	Not Available		Bladder Absent;Extra-Pelvic Metastatic Disease Absent;Parametrium Absent;Paraaortic Nodes Absent;Pelvic Nodes Absent;Supraclavicular Absent
TCGA-C5-A1BL	FEMALE	168	5271	78	27.6361	Cervical Squamous Cell Carcinoma	Cervical	Alive				Stage IB	G2	0	5271			TUMOR FREE		32	16	Not Applicable	TCGA-C5-A1BL	03c3fe57-ae85-4e45-9657-c3182ab5e124	Never Used	ABSENT	Not Available	Not Applicable	Not Available	24	-11723	Not Applicable	1	Not Available	Not Available	0	Not Available	5271	-5	Not Available		Bladder Absent;Extra-Pelvic Metastatic Disease Absent;Parametrium Absent;Paraaortic Nodes Absent;Pelvic Nodes Absent;Supraclavicular Absent
TCGA-C5-A7CL	FEMALE	163	471	103	38.767	Cervical Squamous Cell Carcinoma	Cervical	Dead				Stage IIIB	G2	0	471			WITH TUMOR		48	29	Not Applicable	TCGA-C5-A7CL	BAE2AF5E-484A-44F7-AD6B-66137CDAE300	Not Available	Not Available	Not Available	Not Applicable	Not Available	3	-17869	471	Not Available	Not Available	Not Available	0	Not Available	Not Available	Not Available	Not Available					TCGA-C5-A7CL-D56981	271171D5-3179-4158-AE53-56A570CA3C73	Not Available	27	77
TCGA-ZJ-AAXF	FEMALE	Not Available	0	Not Available		Cervical Squamous Cell Carcinoma	Cervical	Alive	T2b	N0	M0	Stage IIB	G3	0	0			Unknown		62	Not Available	Not Applicable	TCGA-ZJ-AAXF	0ACD1E47-1099-469B-A6D4-E00DB47F57A9	Unknown	Unknown	Not Available	Not Applicable	Not Available	28	-22709	Not Applicable	Not Available	Not Available	Not Available	0	Not Available	0	Not Available	Not Available
TCGA-C5-A7UE	FEMALE	160	4738	63	24.6094	Cervical Squamous Cell Carcinoma	Cervical	Alive				Stage IB1	G2	1		Lung	New Primary Tumor	TUMOR FREE		45	17	Not Applicable	TCGA-C5-A7UE	DA30A845-C4D3-4C78-B8B0-210239224F8F	Not Available	Not Available	Not Available	Not Applicable	Not Available	3	-16473	Not Applicable	Not Available	Not Available	Not Available	0	Not Available	2602	Not Available	Not Available					TCGA-C5-A7UE-D57027	F8C24E83-C9C1-48FC-B371-0CCDD3B809F0	Not Available	28	83
TCGA-4J-AA1J	FEMALE	165	542	48	17.6309	Cervical Squamous Cell Carcinoma	Cervical	Alive	T1b2	N0	M0	Stage IB2	G3	0	542			TUMOR FREE		31	Not Available	Not Applicable	TCGA-4J-AA1J	53EAC147-7EB8-4C54-A982-5E058D6749F8	Never Used	ABSENT	no extension	Not Applicable	Not Available	13	-11611	Not Applicable	Not Available	Not Available	Not Available	0	Not Available	226	226	Not Available
TCGA-DS-A1OC	FEMALE	140	376	78	39.7959	Cervical Squamous Cell Carcinoma	Cervical	Alive	T1b1	N1	M0	Stage IB	G2	0	376			TUMOR FREE		47	Not Available	Not Applicable	TCGA-DS-A1OC	e711b88e-fa0e-4781-8549-7a53ed3a13a1	Not Available	ABSENT	Not Available	None	Other Location, specify	12	-17357	Not Applicable	34	Not Available	Not Available	0	Not Available	376	0	Not Available		Bladder Absent;Extra-Pelvic Metastatic Disease Absent;Parametrium Absent;Paraaortic Nodes Absent;Pelvic Nodes Absent;Supraclavicular Absent			TCGA-DS-A1OC-D15191;TCGA-DS-A1OC-D15190	98AB3883-AF06-4239-BC79-D7D1BC76FBD7;0B4D1E76-9AEA-4129-8E9B-AD0843B068D4	Not Available;Not Available	12;12	332;332
TCGA-Q1-A6DW	FEMALE	160	534	62	24.2188	Cervical Squamous Cell Carcinoma	Cervical	Alive	TX	NX	MX	Stage I	GX	0	534			Unknown		44	35	Not Applicable	TCGA-Q1-A6DW	5DBD5436-696E-40FA-881B-C2386573AC68	Unknown	ABSENT	Not Available	Not Applicable	Not Available	20	-16200	Not Applicable	Not Available	Not Available	Not Available	0	Not Available	175	114	Not Available					TCGA-Q1-A6DW-D46940	B5C77B18-F27A-4CC5-9CF8-6107E83AAFDB	Not Available	20	114
TCGA-EK-A2RE	FEMALE	161	57	54	20.8325	Cervical Squamous Cell Carcinoma	Cervical	Alive	T2a2	N0	MX	Stage IIA	G2	0	57			TUMOR FREE		26	Not Available	Not Applicable	TCGA-EK-A2RE	9AA36AC2-8418-4109-A3C1-63CA8742BAAB	Not Available	ABSENT	Not Available	Not Applicable	Not Available	5	-9743	Not Applicable	Not Available	Not Available	Not Available	0	Not Available	57	0	Not Available
TCGA-EA-A3QE	FEMALE	154	761	73	30.7809	Cervical Squamous Cell Carcinoma	Cervical	Alive	T1b	N0	M0	Stage IB	G2	0	761			TUMOR FREE		45	Not Available	Not Applicable	TCGA-EA-A3QE	A4E444B5-BBCA-4EF0-B92F-908D608CBB91	Never Used	ABSENT	Not Available	Not Applicable	Not Available	9	-16460	Not Applicable	Not Available	Not Available	Not Available	0	Not Available	47	Not Available	Not Available
TCGA-Q1-A5R1	FEMALE	183	474	92	27.4717	Mucinous Adenocarcinoma of Endocervical Type	Cervical	Alive	T1b1	N0	MX	Stage IB1	G2	0	474			TUMOR FREE		32	Not Available	Post-op	TCGA-Q1-A5R1	F93CCD2D-3C77-4BD3-8CAC-5203BD57735F	Current User	ABSENT	Not Available	Not Applicable	Unknown	26	-11705	Not Applicable	Not Available	Not Available	Not Available	0	Not Available	113	6	Not Available
TCGA-VS-A8EI	FEMALE	158	729	58	23.2335	Cervical Squamous Cell Carcinoma	Cervical	Alive	T3b	NX	M0	Stage IIB	GX	0	729			TUMOR FREE		38	Not Available	Not Applicable	TCGA-VS-A8EI	7B228C3B-E604-41A1-9B76-8DD3D5A59FFE	Never Used	Not Available	Not Available	Not Applicable	Not Available	22	-14129	Not Applicable	Not Available	Not Available	Not Available	0	Not Available	428	-1	Not Available					TCGA-VS-A8EI-D64588	9081E806-69F2-43F6-8E10-E6D99C3BACD3	Not Available	5	47
TCGA-UC-A7PI	FEMALE	Not Available	2114	64		Endometrioid Adenocarcinoma of Endocervix	Cervical	Alive	T1b1	N0	MX	Stage IB1	G1	1	778	Other, specify	Locoregional Recurrence	TUMOR FREE		44	Not Available	Not Applicable	TCGA-UC-A7PI	C659F1C9-F3B4-4CFE-8627-2BB716C62B96	Former User	ABSENT	Not Available	Not Applicable	Not Available	17	-16427	Not Applicable	25	Not Available	Not Available	0	Not Available	1905	27	Not Available		Unknown;Extra-Pelvic Metastatic Disease Absent;Unknown;Paraaortic Nodes Absent;Pelvic Nodes Absent;Supraclavicular Absent
TCGA-VS-A9UM	FEMALE	160	829	75	29.2969	Cervical Squamous Cell Carcinoma	Cervical	Dead	T3b	NX	MX	Stage IVB	G2	0	829			TUMOR FREE		39	Not Available	Not Applicable	TCGA-VS-A9UM	EE2C9743-EAA1-4F0D-8D35-E96686AC3913	Never Used	Not Available	Not Available	Not Applicable	Not Available	9	-14255	829	Not Available	Not Available	Not Available	0	Not Available	Not Available	0	Not Available					TCGA-VS-A9UM-D64650;TCGA-VS-A9UM-D64654;TCGA-VS-A9UM-D64655	5E4A789E-39EA-4751-A2C1-1CE33311769B;3B0630CF-E2D6-4CFE-B50C-B5938FFA47C7;4F2F9A4B-B3AF-4690-B6AB-F0E62933E730	Not Available;Not Available;Not Available	9;9;9	459;210;210
TCGA-FU-A3EO	FEMALE	165	490	64	23.5078	Endocervical Type of Adenocarcinoma	Cervical	Alive	T2b	N0	MX	Stage IIB	G2	0	490			TUMOR FREE		55	15	Not Applicable	TCGA-FU-A3EO	B7F2958F-256E-4C30-9C61-11E76DDB36BA	Former User	ABSENT	Not Available	Not Applicable	Positive vaginal margin	15	-20207	Not Applicable	Not Available	Not Available	Not Available	0	Not Available	66	14	Not Available
TCGA-C5-A1ML	FEMALE	Not Available	636	120		Cervical Squamous Cell Carcinoma	Cervical	Dead				Stage IB2	G3	1				WITH TUMOR		49	Not Available	Not Applicable	TCGA-C5-A1ML	374f614a-bcd1-4283-ac6f-fc27ddc79987	Not Available	Not Available	Not Available	Not Applicable	Not Available	21	-18067	636	37	Not Available	37	0	Not Available	Not Available	Not Available	Not Available		Extra-Pelvic Metastatic Disease Present		Extra-Pelvic Metastatic Disease Present
TCGA-MA-AA41	FEMALE	159	279	47	18.591	Cervical Squamous Cell Carcinoma	Cervical	Alive	T2	N1	M1	Stage IIB	G2	1				WITH TUMOR		33	14	Not Applicable	TCGA-MA-AA41	81658CE6-D4A9-4EE0-AE8F-CF2FA8485701	Former User	Not Available	Not Available	Not Applicable	Not Available	16	-12398	Not Applicable	Not Available	Not Available	15	0	Not Available	279	0	Not Available
TCGA-VS-A8EK	FEMALE	153	829	50	21.3593	Cervical Squamous Cell Carcinoma	Cervical	Dead	T4	NX	M0	Stage IVA	G2	0	829			WITH TUMOR		65	Not Available	Not Applicable	TCGA-VS-A8EK	D9C2CA21-F1A6-4CF4-BE28-6C2492DD38E5	Unknown	Not Available	Not Available	Not Applicable	Not Available	22	-23817	829	Not Available	Not Available	Not Available	0	Not Available	Not Available	58	Not Available					TCGA-VS-A8EK-D62778	4608A3B1-2585-4E69-8194-33D9CA824C35	Not Available	24	104
TCGA-DS-A5RQ	FEMALE	148	512	61	27.8488	Cervical Squamous Cell Carcinoma	Cervical	Alive	T1b1	N0	MX	Stage IB1	G2	0	512			TUMOR FREE		80	27	Not Applicable	TCGA-DS-A5RQ	B16469AF-A721-43E9-A4D7-C39B94D1139F	Unknown	ABSENT	Not Available	Not Applicable	Not Available	15	-29526	Not Applicable	32	Not Available	Not Available	0	Not Available	208	0	Not Available		Bladder Absent;Extra-Pelvic Metastatic Disease Absent;Parametrium Absent;Paraaortic Nodes Absent;Pelvic Nodes Absent;Supraclavicular Absent			TCGA-DS-A5RQ-D43181	20A70A61-B65B-4EE9-BA68-1B3738C291A3	Not Available	15	98
TCGA-DS-A7WI	FEMALE	165	252	57	20.9366	Cervical Squamous Cell Carcinoma	Cervical	Dead	T2a2	N1	MX	Stage IIA2	G2	1	206	Other, specify	Locoregional Recurrence	WITH TUMOR		43	Not Available	Not Applicable	TCGA-DS-A7WI	C14468EB-E725-4029-96CC-75BB9EBD9DEF	Never Used	Not Available	Not Available	Not Applicable	Not Available	23	-15970	252	4	Not Available	Not Available	0	Not Available	Not Available	Not Available	Not Available		Bladder Absent;Extra-Pelvic Metastatic Disease Absent;Parametrium Absent;Paraaortic Nodes Absent;Pelvic Nodes Present;Supraclavicular Absent			TCGA-DS-A7WI-D54772	7D8F75F1-23CB-44C0-B948-3494D6D754CE	Not Available	23	108
TCGA-FU-A3HY	FEMALE	170	954	74	25.6055	Cervical Squamous Cell Carcinoma	Cervical	Alive	T1b2	N1	MX	Stage IB2	G2	0	954			TUMOR FREE		47	16	Not Applicable	TCGA-FU-A3HY	674E010C-7AD4-4DC2-86B0-284CD4560633	Former User	Not Available	Not Available	Not Applicable	Not Available	16	-17228	Not Applicable	Not Available	Not Available	Not Available	0	Not Available	20	Not Available	Not Available					TCGA-FU-A3HY-D64211	6B9972B5-AE6C-4658-BA1B-30CDE0D8C214	Not Available	27	91
TCGA-VS-A9UY	FEMALE	163	555	46	17.3134	Cervical Squamous Cell Carcinoma	Cervical	Dead	T1b2	NX	MX	Stage IVB	G2	1	412	Head & Neck	Distant Metastasis	WITH TUMOR		29	Not Available	Not Applicable	TCGA-VS-A9UY	A1B99260-8643-4CEF-95A0-3853D64762B7	Unknown	Not Available	Not Available	Not Applicable	Not Available	5	-10707	555	Not Available	Not Available	Not Available	0	Not Available	Not Available	0	Not Available					TCGA-VS-A9UY-D64585	47D7D03D-BCC9-4123-AE5B-71157465604C	Not Available	5	34
TCGA-C5-A7CG	FEMALE	169	6408	94	32.912	Cervical Squamous Cell Carcinoma	Cervical	Alive	T1b	N0	MX	Stage IB	G2	0	6408			TUMOR FREE		55	Not Available	Not Applicable	TCGA-C5-A7CG	F2C901D1-2039-4046-89B5-C2D45BCF10C3	Never Used	Not Available	Not Available	margins free of tumor	Other Location, specify	3	-20242	Not Applicable	20	Not Available	Not Available	0	Not Available	5564	Not Available	Not Available
TCGA-EA-A78R	FEMALE	160	410	63	24.6094	Cervical Squamous Cell Carcinoma	Cervical	Alive	T1b1	NX	M0	Stage IB1	G2	0	410			TUMOR FREE		54	Not Available	Not Applicable	TCGA-EA-A78R	79AE5209-F476-4D65-A6C0-EBC18D7C8942	Unknown	ABSENT	Not Available	Not Applicable	Not Available	21	-19942	Not Applicable	Not Available	Not Available	Not Available	0	Not Available	12	Not Available	Not Available
TCGA-C5-A1MH	FEMALE	Not Available	1186	Not Available		Cervical Squamous Cell Carcinoma	Cervical	Dead				Stage IIIB	G3	1	178	Lung	Distant Metastasis	WITH TUMOR		71	Not Available	Not Applicable	TCGA-C5-A1MH	3143822c-66c4-4b58-8d29-e92d065ff049	Not Available	Not Available	Not Available	Not Applicable	Not Available	19	-26234	1186	-2	Not Available	1	0	Not Available	Not Available	Not Available	Not Available		Bladder Absent;Extra-Pelvic Metastatic Disease Present;Parametrium Absent;Paraaortic Nodes Absent;Pelvic Nodes Absent;Supraclavicular Absent			TCGA-C5-A1MH-D29284;TCGA-C5-A1MH-D29287	DEB8FE59-1B43-48EE-AD48-8F8D46FC5F71;35858E07-7A94-4FB6-AB9E-C355907B7DF2	Not Available;Not Available	13;13	65;Not Available
TCGA-IR-A3L7	FEMALE	177	4483	89	28.4082	Cervical Squamous Cell Carcinoma	Cervical	Alive	T1b1	N0	M0	Stage IB1	G3	0	4483			TUMOR FREE		37	17	Not Applicable	TCGA-IR-A3L7	66229DD6-C771-4455-A90C-C66FB40CF7FE	Former User	ABSENT	Not Available	Not Applicable	Not Available	13	-13559	Not Applicable	Not Available	Not Available	Not Available	0	Not Available	3509	Not Available	Not Available					TCGA-IR-A3L7-D38291	99356D52-C28E-407A-A29D-E5A1088525CE	Not Available	14	99
TCGA-VS-A8EG	FEMALE	160	1386	66	25.7812	Cervical Squamous Cell Carcinoma	Cervical	Alive	T1b1	NX	M0	Stage IB1	GX	0	1386			TUMOR FREE		36	Not Available	Not Applicable	TCGA-VS-A8EG	B0B293C1-BD7E-4BA8-9F44-47398488EF2C	Current User	Not Available	Not Available	Not Applicable	Not Available	22	-13166	Not Applicable	Not Available	Not Available	Not Available	0	Not Available	883	76	Not Available
TCGA-EK-A2RL	FEMALE	154	1453	89	37.5274	Endocervical Type of Adenocarcinoma	Cervical	Dead	T1b1	N1	MX	Stage IB	G2	1	1143	Cervix	Locoregional Recurrence	TUMOR FREE		32	Not Available	Not Applicable	TCGA-EK-A2RL	61EB08D0-EA01-45E7-884B-AC3D6070172A	Not Available	PRESENT	Not Available	Not Applicable	Not Available	1	-12047	Not Applicable	20	Not Available	Not Available	0	Not Available	721	24	Not Available					TCGA-EK-A2RL-D58212	74B640D3-522E-4D42-9C30-BA9132FDE318	Not Available	2	968
TCGA-EA-A410	FEMALE	160	803	80	31.25	Cervical Squamous Cell Carcinoma	Cervical	Alive	T2a2	N0	M0	Stage IIA2	G2	0	803			TUMOR FREE		51	Not Available	Not Applicable	TCGA-EA-A410	7B356C12-B226-4E58-BE7F-44E50E3EEFBE	Never Used	ABSENT	Not Available	Not Applicable	Not Available	24	-18720	Not Applicable	Not Available	Not Available	Not Available	0	Not Available	56	Not Available	Not Available
TCGA-C5-A8YQ	FEMALE	165	715	70	25.7117	Cervical Squamous Cell Carcinoma	Cervical	Dead				Stage IB1	G2	0	715			WITH TUMOR		79	23	Not Applicable	TCGA-C5-A8YQ	DE3CFB81-25C3-4137-8F24-AD8AA607C158	Not Available	Not Available	Not Available	Not Applicable	Not Available	17	-28873	715	Not Available	Not Available	Not Available	0	Not Available	Not Available	Not Available	Not Available					TCGA-C5-A8YQ-D58639	ED687F1B-1E47-4D1B-AF20-7C902B7766E3	Not Available	17	Not Available
TCGA-C5-A8YT	FEMALE	Not Available	633	Not Available		Cervical Squamous Cell Carcinoma	Cervical	Dead				Stage IB1	G3	1				WITH TUMOR		36	16	Not Applicable	TCGA-C5-A8YT	CECAECB4-51EF-407D-A882-0E4B444B0A77	Never Used	Not Available	Not Available	Not Applicable	Not Available	17	-13253	Not Applicable	Not Available	Not Available	Not Available	0	Not Available	186	Not Available	Not Available					TCGA-C5-A8YT-D58633	023568BE-29CA-47DC-A39F-9E562969725B	Not Available	17	Not Available
TCGA-JW-A5VH	FEMALE	163	100	80	30.1103	Cervical Squamous Cell Carcinoma	Cervical	Dead	T4	NX	M1	Stage IVB	G2	1	94	Other, specify	Distant Metastasis	WITH TUMOR		53	Not Available	N/A	TCGA-JW-A5VH	6813C53C-B256-4115-AD90-24D75328779E	Unknown	Not Available	Not Available	Not Applicable	Not Available	31	-19423	100	7	Not Available	Not Available	0	Not Available	Not Available	5	Not Available		Extra-Pelvic Metastatic Disease Present;Pelvic Nodes Present			TCGA-JW-A5VH-D46358;TCGA-JW-A5VH-D69368	1A8782DE-A9E9-4CE0-A472-584BE2B1272C;D7A732E4-CD7C-47F1-853A-26C9493EB66C	Not Available;Not Available	6;7	48;48
TCGA-ZJ-A8QR	FEMALE	Not Available	582	58		Cervical Squamous Cell Carcinoma	Cervical	Dead	TX	NX	MX	Stage I	GX	0	582			Unknown		38	36	Not Applicable	TCGA-ZJ-A8QR	DB44488E-4ED0-4082-BCA0-BBFD22FF0537	Unknown	Not Available	Not Available	Not Applicable	Not Available	25	-14225	582	Not Available	Not Available	Not Available	0	Not Available	Not Available	-2	Not Available
TCGA-ZJ-AAXJ	FEMALE	Not Available	0	Not Available		Cervical Squamous Cell Carcinoma	Cervical	Alive	T2b	N0	MX	Stage IIB	Not Available	0	0			Unknown		43	Not Available	Not Applicable	TCGA-ZJ-AAXJ	6B60BF8E-29A1-4C6B-9EAD-AEA4DDC99064	Unknown	Not Available	Not Available	Not Applicable	Not Available	31	-16007	Not Applicable	Not Available	Not Available	Not Available	0	Not Available	0	Not Available	Not Available
TCGA-C5-A1BF	FEMALE	Not Available	570	76		Cervical Squamous Cell Carcinoma	Cervical	Dead	TX	N0	MX	Stage IB	G1	1	93	Other, specify	Distant Metastasis	WITH TUMOR		46	Not Available	Not Applicable	TCGA-C5-A1BF	262311a0-7a10-4934-8fba-11ee581ad738	Not Available	Not Available	Not Available	Not Applicable	Not Available	12	-16975	570	13	Not Available	Not Available	0	Not Available	Not Available	Not Available	Not Available		Bladder Present;Extra-Pelvic Metastatic Disease Absent;Parametrium Absent;Paraaortic Nodes Absent;Pelvic Nodes Absent;Supraclavicular Absent			TCGA-C5-A1BF-D30724	484070B1-FD8E-46A3-B031-DA66D5641485	Not Available	16	Not Available
TCGA-VS-A957	FEMALE	156	1688	91	37.3932	Cervical Squamous Cell Carcinoma	Cervical	Alive	T1b1	NX	MX	Stage IB1	G3	0	1688			TUMOR FREE		64	Not Available	Not Applicable	TCGA-VS-A957	CB31B3CE-8595-4D75-9436-BB59E95C3A19	Never Used	Not Available	Not Available	Not Applicable	Not Available	27	-23585	Not Applicable	Not Available	Not Available	Not Available	0	Not Available	1280	118	Not Available					TCGA-VS-A957-D62800	FE43C9DF-DCCC-4A9A-B4E6-05BD6260167D	Not Available	24	140
TCGA-VS-A8QM	FEMALE	163	951	53	19.9481	Cervical Squamous Cell Carcinoma	Cervical	Dead	TX	NX	M1	Stage IVB	GX	0	951			WITH TUMOR		47	15	Not Applicable	TCGA-VS-A8QM	27D2B645-F1BF-4486-B0B5-273681B58625	Unknown	Not Available	Not Available	Not Applicable	Not Available	1	-17168	951	Not Available	Not Available	Not Available	0	Not Available	Not Available	-334	Not Available					TCGA-VS-A8QM-D61947;TCGA-VS-A8QM-D65296	5079FF1A-2F4B-4088-8168-7A3A3042489A;1C0DBDC1-83FA-4B53-A402-A48ABA89A4B4	Not Available;Not Available	10;21	136;81
TCGA-ZJ-AAXB	FEMALE	163	0	97	36.5087	Endocervical Adenocarcinoma of the Usual Type	Cervical	Alive	T1b2	N0	M0	Stage IB2	G3	0	0			Unknown		42	Not Available	Not Applicable	TCGA-ZJ-AAXB	88F0AA4A-6BFD-4573-B136-58F84F867F10	Unknown	Not Available	Not Available	Not Applicable	Not Available	31	-15492	Not Applicable	Not Available	Not Available	Not Available	0	Not Available	0	Not Available	Not Available
TCGA-C5-A7CO	FEMALE	158	4482	98	39.2565	Cervical Squamous Cell Carcinoma	Cervical	Alive				Stage IB2	G2	0	4482			TUMOR FREE		68	20	Not Applicable	TCGA-C5-A7CO	FF3808E4-EECE-4046-819B-FE1019317F8E	Not Available	Not Available	Not Available	Not Applicable	Not Available	3	-25045	Not Applicable	Not Available	Not Available	Not Available	0	Not Available	2233	Not Available	Not Available					TCGA-C5-A7CO-D56985	120E8710-FFBF-48B1-8C5B-676E7B0E3876	Not Available	27	69
TCGA-DS-A0VK	FEMALE	165	1118	52	19.1001	Cervical Squamous Cell Carcinoma	Cervical	Dead	T1b1	N1	M0	Stage IB	G3	1	209	Other, specify	Distant Metastasis	WITH TUMOR		45	Not Available	Not Applicable	TCGA-DS-A0VK	5ed3c95a-10d0-4cd5-a54d-523e81587fb1	Never Used	ABSENT	Not Available	Not Applicable	Positive vaginal margin	3	-16792	1118	-1	Not Available	Not Available	0	Not Available	Not Available	-71	Not Available		Bladder Absent;Extra-Pelvic Metastatic Disease Absent;Parametrium Present;Paraaortic Nodes Absent;Pelvic Nodes Absent;Supraclavicular Absent			TCGA-DS-A0VK-D8640	e74bdcd2-ccde-4ffd-96f8-9707f96b17c4	Not Available	1	398
TCGA-C5-A7CH	FEMALE	161	4694	104	40.1219	Cervical Squamous Cell Carcinoma	Cervical	Alive				Stage IIB	G2	0	4694			Unknown		43	Not Available	Not Applicable	TCGA-C5-A7CH	D626A732-AF64-4DEC-B4BF-3CB761BF4C8D	Not Available	Not Available	Not Available	Not Applicable	Not Available	3	-15777	Not Applicable	Not Available	Not Available	Not Available	0	Not Available	771	Not Available	Not Available					TCGA-C5-A7CH-D56511	797AE99C-E4D4-4EDE-8E29-0A8F3A1BE314	Not Available	11	Not Available
TCGA-ZJ-AAXD	FEMALE	Not Available	0	Not Available		Cervical Squamous Cell Carcinoma	Cervical	Alive	T3b	N0	M0	Stage IIIB	G2	0	0			Unknown		35	Not Available	Not Applicable	TCGA-ZJ-AAXD	AF33DF2E-9737-4F63-952C-858A70AA589C	Unknown	Not Available	Not Available	Not Applicable	Not Available	30	-12968	Not Applicable	Not Available	Not Available	Not Available	0	Not Available	0	Not Available	Not Available
TCGA-FU-A23K	FEMALE	165	372	91	33.4252	Cervical Squamous Cell Carcinoma	Cervical	Alive	T1b1	N1	MX	Stage IIIB	G3	0	372			TUMOR FREE		28	Not Available	Not Applicable	TCGA-FU-A23K	85abfd69-cf72-43f6-a7dd-97056f22c91b	Not Available	Not Available	Not Available	Not Applicable	Not Available	18	-10551	Not Applicable	6	Not Available	Not Available	0	Not Available	37	Not Available	Not Available		Bladder Absent;Extra-Pelvic Metastatic Disease Absent;Parametrium Absent;Paraaortic Nodes Absent;Pelvic Nodes Absent;Supraclavicular Absent
TCGA-DS-A1OD	FEMALE	155	3874	89	37.0447	Cervical Squamous Cell Carcinoma	Cervical	Alive	T1b1	N0	M0	Stage IB1	G3	0	3874			TUMOR FREE		49	Not Available	Not Applicable	TCGA-DS-A1OD	ec609ebe-2db9-4b95-a154-512fdfa9038f	Never Used	ABSENT	Not Available	None	Other Location, specify	12	-17954	Not Applicable	2	Not Available	Not Available	0	Not Available	3097	5	Not Available		Bladder Absent;Extra-Pelvic Metastatic Disease Absent;Parametrium Present;Paraaortic Nodes Absent;Pelvic Nodes Absent;Supraclavicular Absent			TCGA-DS-A1OD-D15186	5FF927AF-D6B8-41A8-984D-219DC466B2A9	Not Available	12	96
TCGA-C5-A1MF	FEMALE	163	1617	70	26.3465	Cervical Squamous Cell Carcinoma	Cervical	Alive	T1b2	N0	MX	Stage IB2	G2	0	1617			TUMOR FREE		49	20	Not Applicable	TCGA-C5-A1MF	4f514ed4-3be6-44bc-a531-210027846459	Former User	ABSENT	Not Available	margins free of tumor	Other Location, specify	25	-17911	Not Applicable	31	Not Available	Not Available	0	Not Available	1617	34	Not Available		Bladder Absent;Extra-Pelvic Metastatic Disease Absent;Parametrium Absent;Paraaortic Nodes Absent;Pelvic Nodes Absent;Supraclavicular Absent
TCGA-EK-A2IP	FEMALE	167	202	69	24.7409	Cervical Squamous Cell Carcinoma	Cervical	Alive	T1b1	N0	MX	Stage IB1	G3	0	202			Not Available		28	Not Available	Not Applicable	TCGA-EK-A2IP	76B54726-D348-4A1B-AE26-5B08D2EFFC9D	Not Available	Not Available	Not Available	Not Applicable	Not Available	4	-10347	Not Applicable	-2	Not Available	Not Available	0	Not Available	202	8	Not Available
TCGA-MY-A5BD	FEMALE	157	1667	91	36.9183	Cervical Squamous Cell Carcinoma	Cervical	Alive	T2b	N0	M0	Stage IIB	G1	0	1667			TUMOR FREE		62	Not Available	Not Applicable	TCGA-MY-A5BD	CEF2EFB2-93CC-4BDF-A343-9965E7E0432C	Not Available	PRESENT	Not Available	Not Applicable	Not Available	20	-22901	Not Applicable	Not Available	Not Available	Not Available	0	Not Available	904	Not Available	Not Available					TCGA-MY-A5BD-D67175	6E4581C1-EB5C-493C-8EEC-E6B8ECE74BB5	Not Available	31	119
[truncated: 240 more columns]
